# Supplementary material
Source: PubMed Central journal article supplement (PMC3740455)
Supplement: NIHMS422807-supplement-Supp_AppendixS1.pdf [file NIHMS422807-supplement-Supp_AppendixS1.pdf]

| Authors                                      | Title                                                                                                                | Year | Journal                     | Source | Exclusion   |
|----------------------------------------------|----------------------------------------------------------------------------------------------------------------------|------|-----------------------------|--------|-------------|
| <b>Duplication</b>                           |                                                                                                                      |      |                             |        |             |
| Aggarwal, S. K., Sinha, S. K., Kumar, A.,    | Traumatic strictures of the posterior urethra in boys with special reference to recurrent strictures.                | 2011 | J. Pediatr. Urol.           | Embase | Duplication |
| Al-Ba'Adani, T. H., Al-Asbahi, W., Al-Towa   | Urethral stricture Yemen experience. International                                                                   | 2010 | International Urology and N | Embase | Duplication |
| Al-Qudah, H. S., & Santucci, R. A.           | Extended complications of urethroplasty.                                                                             | 2005 | Int. Braz. J. Urol.         | Embase | Duplication |
| Al-Rifaei, M. A., Zaghoul, S., & Al-Rifaei,  | Bulboprostatic anastomotic urethroplasty with preservation of potency: Anatomical study, operative approach          | 2005 | Scand. J. Urol. Nephrol.    | Embase | Duplication |
| Alhasan, S. U., Aji, S. A., Mohammed, A.     | Transurethral resection of the prostate in Northern Nigeria, problems and prospects.                                 | 2008 | BMC Urol.                   | Embase | Duplication |
| Amsalem, H., Fitzgerald, B., Keating, S.,    | Congenital megalourethra: prenatal diagnosis and postnatal/autopsy findings in 10 cases.                             | 2011 | Ultrasound Obstet. Gynecol  | Embase | Duplication |
| Anger                                        | The effect of bulbar urethroplasty on erectile function.                                                             | 2007 | J. Urol.                    | Google | Duplication |
| Anger, J. T., Sherman, N. D., & Webster,     | The Effect of Bulbar Urethroplasty on Erectile Function.                                                             | 2007 | J. Urol.                    | Embase | Duplication |
| Anger, J. T., Sherman, N. D., Dielubanza     | Erectile function after posterior urethroplasty for pelvic fracture-urethral distraction defect injuries.            | 2009 | BJU Int.                    | Embase | Duplication |
| Anikwe, R. M., Kamal, B. A., Hegazi, M.      | Anterior hypospadias. Is repair necessary with urination in a sitting or squatting position?                         | 2000 | Saudi Med. J.               | Embase | Duplication |
| Asci, R., Sarikaya, S., Buyukalpelli, R., e  | Voiding and sexual dysfunctions after pelvic fracture urethral injuries treated with either initial cystostomy and   | 1999 | Scand. J. Urol. Nephrol.    | Embase | Duplication |
| Augustin, H., Pummer, K., Daghofer, F., e    | Patient self-reporting questionnaire on urological morbidity and bother after radical retropubic prostatectomy.      | 2002 | Eur. Urol.                  | Embase | Duplication |
| Bach, T., Netsch, C., Pohlmann, L., et al.   | Thulium:YAG vapoenucleation in large volume prostates.                                                               | 2011 | J. Urol.                    | Embase | Duplication |
| Baird, A. D., Gearhart, J. P., & Mathews,    | Applications of the modified Cantwell-Ransley epispadias repair in the exstrophy-epispadias complex.                 | 2005 | J. Pediatr. Urol.           | Embase | Duplication |
| Baran, C. N., Tiftikcioglu, Y. O., Ozdemir,  | What is new in the treatment of hypospadias?                                                                         | 2004 | Plast. Reconstr. Surg.      | Embase | Duplication |
| Barbagli, G., De Angelis, M., Romano, G      | Long-Term Followup of Bulbar End-to-End Anastomosis: A Retrospective Analysis of 153 Patients in a Single            | 2007 | J. Urol.                    | Embase | Duplication |
| Beltramo, G., Bianchi, L. C., Bergantin, A   | Stereotactic hypofractionated body radiotherapy: An emerging treatment approach for clinically localized pros        | 2010 | Anticancer Res.             | Embase | Duplication |
| Benoit, R. M., Naslund, M. J., & Cohen, J    | Complications after radical retropubic prostatectomy in the medicare population.                                     | 2000 | Urology                     | Embase | Duplication |
| Berger, A. P., Deibl, M., Bartsch, G., et al | A comparison of one-stage procedures for post-traumatic urethral stricture repair.                                   | 2005 | BJU Int.                    | Embase | Duplication |
| Braga, L. H. P., Pippi Salle, J. L., Dave, S | Outcome Analysis of Severe Chordee Correction Using Tunica Vaginalis as a Flap in Boys With Proximal Hy              | 2007 | J. Urol.                    | Embase | Duplication |
| Carlton, J., Patel, M., & Morey, A. F.       | Erectile function after urethral reconstruction.                                                                     | 2008 | Asian J Androl.             | Embase | Duplication |
| Chahal, R., Sundaram, S. K., et al.          | Assessment of voiding outcome, sexual function and quality of life two years following KTP/YAG hybrid laser          | 2000 | Urologia Internationalis    | Embase | Duplication |
| Chalouhy, E., Jabbour, M., Armache, K.,      | Management of posttraumatic posterior urethral disruption. Le Journal médical libanais.                              | 1997 | Le Journal Medical Libanais | Embase | Duplication |
| Chen, L., Hu, B., Feng, C., et al.           | Predictive value of penile dynamic colour duplex doppler ultrasound parameters in patients with posttraumat          | 2011 | J. Int. Med. Res.           | Embase | Duplication |
| Chertin, B., Koulikov, D., Hadas-Halpern,    | Masculinizing genitoplasty in intersex patients.                                                                     | 2005 | J. Urol.                    | Embase | Duplication |
| Corriere, J. N., Jr.                         | 1-Stage delayed bulboprostatic anastomotic repair of posterior urethral rupture: 60 Patients with 1-year follow      | 2001 | J. Urol.                    | Embase | Duplication |
| Coursey, J. W., Morey, A. F., Mcaninch, J    | Erectile function after anterior urethroplasty.                                                                      | 2001 | J. Urol.                    | Embase | Duplication |
| Dakum, N. K., Ramiyl, V. M., & Amu, C.       | Outcome of urethroplasty for urethral stricture at Jos University Teaching Hospital.                                 | 2008 | Niger J. Clin. Pract.       | Embase | Duplication |
| Das S, Tunuguntla HS.                        | Balanitis xerotica obliterans--a review.                                                                             | 2000 | World J. Urol.              | PubMed | Duplication |
| de Leon, J. P.                               | Erectile function, sexual drive, and ejaculatory function alter reconstructive surgery for anterior urethral strictu | 2007 | BJU Int.                    | Embase | Duplication |
| Djordjevic, M. L., Stanojevic, D., Bizic, M  | Metoidioplasty as a single stage sex reassignment surgery in female transsexuals: Belgrade experience.               | 2009 | J. Sex. Med.                | Embase | Duplication |
| Dogra, P. N., Saini, A. K., & Seth, A.       | Erectile dysfunction after anterior urethroplasty: A prospective analysis of incidence and probability of recover    | 2011 | Urology                     | Embase | Duplication |
| Dogra, P., Saini, A., & Seth, A.             | Erectile dysfunction following anterior urethroplasty: A prospective analysis of incidence and probability of rec    | 2011 | J. Urol.                    | Embase | Duplication |
| Doust, J., Miller, E., Duchesne, G., et al.  | A systematic review of brachytherapy. Is it an effective and safe treatment for localised prostate cancer?           | 2004 | Aust Fam Physician          | Embase | Duplication |
| Dubey, D., Kumar, A., Bansal, P. et al       | Substitution urethroplasty for anterior urethral strictures: A critical appraisal of various techniques.             | 2003 | BJU Int.                    | Embase | Duplication |
| Dubey, D., Sehgal A., Srivastava A., et al   | Buccal mucosal urethroplasty for balanitis xerotica obliterans related urethral strictures: The outcome of 1 an      | 2005 | J. Urol.                    | Embase | Duplication |
| Eeekt, K. V., Gontero, P., & Joniau, S.      | End-to-end repair or buccal mucosa graft for single-stage bulbar urethroplasty?                                      | 2010 | J. Urol.                    | Embase | Duplication |
| Elliott, D. S., & Barrett, D. M.             | Long-term followup and evaluation of primary realignment of posterior urethral disruptions.                          | 1997 | J. Urol.                    | Embase | Duplication |
| Elliott, S. P.                               | The evolution of urethral reconstruction.                                                                            | 2011 | J. Urol.                    | Embase | Duplication |
| Eltahawy, E. A., Virasoro, R., Schlossber    | Long-Term Followup for Excision and Primary Anastomosis for Anterior Urethral Strictures.                            | 2007 | J. Urol.                    | Embase | Duplication |
| Erickson, B. A., Granieri, M. A., Cashy, J.  | Prospective analysis of sexual function after anterior urethroplasty: Incidence, and recovery of function.           | 2009 | J. Urol.                    | Embase | Duplication |
| Erickson, B. A., Granieri, M. A., Meeks, J   | Prospective Analysis of Erectile Dysfunction After Anterior Urethroplasty: Incidence and Recovery of Function        | 2010 | J. Urol.                    | Embase | Duplication |

|                                               |                                                                                                                      |      |                           |              |             |
|-----------------------------------------------|----------------------------------------------------------------------------------------------------------------------|------|---------------------------|--------------|-------------|
| Erickson, B. A., Granieri, M. A., Meeks, J    | Prospective Analysis of Ejaculatory Function After Anterior Urethral Reconstruction.                                 | 2010 | J. Urol.                  | Embase       | Duplication |
| Erickson, B. A., Wysock, J. S., McVary, K     | Erectile function, sexual drive, and ejaculatory function after reconstructive surgery for anterior urethral strictu | 2007 | BJU Int.                  | Embase       | Duplication |
| Erlichman, M., Handelsman, H., & Hotta,       | Cryosurgery for recurrent prostate cancer following radiation therapy.                                               | 1999 | Health Technol. Assess.   | Embase       | Duplication |
| Erol, D., Emir, L., & Germiyanoglu, C.        | Outcome of pull-in procedure in children with severe post-disruption posterior urethral strictures.                  | 2001 | Pediatr. Surg. Int.       | Embase       | Duplication |
| Feng, C., Xu, Y.-M., Yu, J.-J., et al.        | Risk factors for erectile dysfunction in patients with urethral strictures secondary to blunt trauma.                | 2008 | J. Sex. Med.              | Embase       | Duplication |
| Fu Q, Sun X, Tang C, et al.                   | An assessment of the efficacy and safety of sildenafil administered to patients with erectile dysfunction refer      | 2012 | J. Sex. Med.              | Other Search | Duplication |
| Fu, Q., Sun, X., Tang, C., et al.             | An Assessment of the Efficacy and Safety of Sildenafil Administered to Patients with Erectile Dysfunction Ref        | 2012 | J. Sex. Med.              | Embase       | Duplication |
| Galek, L., Darewicz, B., Kudelski, J., et a   | Microsurgical replantation of sexual organs in three patients.                                                       | 2002 | Scand. J. Urol. Nephrol.  | Embase       | Duplication |
| Graziotti, P., Giusti, G., Seveso, et al.     | Retropubic nerve and seminal sparing radical prostatectomy for recurrent bladder neck-prostatic urethra stric        | 2005 | Arch. Ital. Urol. Androl. | Embase       | Duplication |
| Gulino, G., Sasso, F., Falabella, R., et al.  | Distal Urethral Reconstruction of the Glans for Penile Carcinoma: Results of a Novel Technique at 1-Year of F        | 2007 | J. Urol.                  | Embase       | Duplication |
| Gupta, D., Bhardwaj, M., Sharma, S., et a     | Long-term psychosocial adjustments, satisfaction related to gender and the family equations in disorders of s        | 2010 | Pediatr. Surg. Int.       | Embase       | Duplication |
| Gupta, N. P., Mishra, S., Dogra, P. N., et    | Outcome of end-to-end urethroplasty: Single-center experience.                                                       | 2009 | Urologia Internationalis  | Embase       | Duplication |
| Gupta, N. P., Mishra, S., Dogra, P. N., et    | Transpubic urethroplasty for complex posterior urethral strictures: A single center experience.                      | 2009 | Urologia Internationalis  | Embase       | Duplication |
| Guralnick, M. L., & Webster, G. D.            | The augmented anastomotic urethroplasty: Indications and outcome in 29 patients.                                     | 2001 | J. Urol.                  | Embase       | Duplication |
| Gyan, S., Sushma, S., Maneesh, S., et a       | Successful microsurgical penile replantation following self amputation in a schizophrenic patient.                   | 2010 | Indian J. Urol.           | Embase       | Duplication |
| Hammadeh, M. Y., Madaan, S., Hines, J.        | 5-Year outcome of a prospective randomized trial to compare transurethral electrovaporization of the prostate        | 2003 | Urology                   | Embase       | Duplication |
| Hammadeh, M. Y., Madaan, S., Singh, M         | Two-year follow-up of a prospective randomised trial of electrovaporization versus resection of prostate.            | 1998 | Eur. Urol.                | Embase       | Duplication |
| Hayn, M. H., Bellinger, M. F., & Schneck,     | Small Intestine Submucosa as a Corporal Body Graft in the Repair of Severe Chordee.                                  | 2009 | Urology                   | Embase       | Duplication |
| Healy, C. E., Leonard, D. S., Cahill, R., e   | Primary endourologic realignment of complete posterior urethral disruption.                                          | 2007 | Ir. Med. J.               | Embase       | Duplication |
| Healy, C., Cahill, R. A., Quinlan, D., et al. | Primary endourologic realignment of complete posterior urethral disruption.                                          | 2007 | Ir. Med. J.               | Embase       | Duplication |
| Hosseini, J., & Tavakkoli Tabassi, K.         | Surgical repair of posterior urethral defects: review of literature and presentation of experiences.                 | 2008 | Urol J.                   | Embase       | Duplication |
| Hudak SJ, Morey AF.                           | Impact of 3.5 cm artificial urinary sphincter cuff on primary and revision surgery for male stress urinary incont    | 2011 | J. Urol.                  | Other Search | Duplication |
| Hudak, S. J., & Morey, A. F.                  | Impact of 3.5 cm artificial urinary sphincter cuff on primary and revision surgery for male stress urinary incont    | 2011 | J. Urol.                  | Embase       | Duplication |
| Ibishev, K. S.                                | Efficiency of combined therapy with impaza and type 5 phosphodiesterase inhibitors in prophylactics of post          | 2009 | Bull. Exp. Biol. Med.     | Embase       | Duplication |
| Jain, D. K., & Talwar, R.                     | Outcome of dorsal onlay buccal mucosa substitution urethroplasty in long strictures of anterior urethra.             | 2007 | Med J Armed Forces India  | Embase       | Duplication |
| Jepson, B. R., Boullier, J. A., Moore, R. C   | Traumatic posterior urethral injury and early primary endoscopic realignment: Evaluation of long-term follow-u       | 1999 | Urology                   | Embase       | Duplication |
| Jeziar, J. R., & Schlossberg, S. M.           | Excision and primary anastomosis for anterior urethral stricture.                                                    | 2002 | Urol. Clin. North Am.     | Embase       | Duplication |
| Johnson, E. K., & Latini, J. M.               | The impact of urethroplasty on voiding symptoms and sexual function.                                                 | 2011 | Urology                   | Embase       | Duplication |
| Johnson, E., & Latini, J.                     | The impact of urethroplasty on voiding symptoms and sexual function.                                                 | 2009 | Neurourol. Urodyn.        | Embase       | Duplication |
| Jones, J. S.                                  | Management of urethral straddle injury after radical prostatectomy.                                                  | 2002 | Urology                   | Embase       | Duplication |
| Kao, T.-C., Cruess, D. F., Garner, D., et a   | Multicenter patient self-reporting questionnaire on impotence, incontinence and stricture after radical prostate     | 2000 | J. Urol.                  | Embase       | Duplication |
| Kardar, A. H., Aslam, M., & Lindstedt, E.     | An unusual complication of penile prosthesis following urethroplasty.                                                | 2002 | Scand. J. Urol. Nephrol.  | Embase       | Duplication |
| Kaya, C., Ilktac, A., Gokmen, E., et al.      | The long-term results of transurethral vaporization of the prostate using plasmakinetic energy.                      | 2007 | BJU Int.                  | Embase       | Duplication |
| Kessler TM, Fisch M, Heitz M, et al.          | Patient satisfaction with the outcome of surgery for urethral stricture.                                             | 2002 | J. Urol.                  | Google       | Duplication |
| Kessler, T. M., Fisch, M., Heitz, M., et al.  | Patient satisfaction with the outcome of surgery for urethral stricture.                                             | 2002 | J. Urol.                  | Embase       | Duplication |
| Khan, M. S., Thornhill, J. A., Grainger, R.   | Rupture of the male membranous urethra.                                                                              | 2000 | Irish J. Med. Science     | Embase       | Duplication |
| Kolon, T. F., & Gonzales, E. T., Jr.          | The dorsal inlay graft for hypospadias repair.                                                                       | 2000 | J. Urol.                  | Embase       | Duplication |
| Koraitim, M. M.                               | On the art of anastomotic posterior urethroplasty: A 27-year experience.                                             | 2005 | J. Urol.                  | Embase       | Duplication |
| Koraitim, M. M.                               | Transpubic Urethroplasty Revisited: Total, Superior, or Inferior Pubectomy?                                          | 2010 | Urology                   | Embase       | Duplication |
| Krstic, Z. D., Smoljanic, Z., Micovic, Z., e  | Surgical treatment of the Mullerian duct remnants.                                                                   | 2001 | J. Pediatr. Surg.         | Embase       | Duplication |
| Levine, L. A., Strom, K. H., et al.           | Buccal Mucosa Graft Urethroplasty for Anterior Urethral Stricture Repair: Evaluation of the Impact of Stricture      | 2007 | J. Urol.                  | Embase       | Duplication |
| Liao, L.-M., Shi, B.-Y., Liang, C.-Q., et al. | Evaluation for Madigan's prostatectomy in patients with benign prostatic hyperplasia.                                | 2001 | Asian J Androl.           | Embase       | Duplication |
| Lumen                                         | Assessment of the short-term functional outcome after urethroplasty: a prospective analysis.                         | 2011 | Int. Braz. J. Urol.       | Google       | Duplication |
| Lumen, N., Hoebeke, P., & Oosterlinck, V      | Ventral longitudinal stricturotomy and transversal closure: The heineke-mikulicz principle in urethroplasty.         | 2010 | Urology                   | Embase       | Duplication |
| Lumen, N., Hoebeke, P., Troyer, B. D., et     | Perineal Anastomotic Urethroplasty for Posttraumatic Urethral Stricture With or Without Previous Urethral Ma         | 2009 | J. Urol.                  | Embase       | Duplication |

|                                                |                                                                                                                       |      |                                |              |             |
|------------------------------------------------|-----------------------------------------------------------------------------------------------------------------------|------|--------------------------------|--------------|-------------|
| Lumen, N., Speers, S., De Backer, S., et al    | Assessment of the functional outcome after urethroplasty: A prospective analysis.                                     | 2011 | Eur. Urol.                     | Embase       | Duplication |
| MacDonald, M. F., Al-Qudah, H. S., & Sa        | Minimal impact urethroplasty allows same-day surgery in most patients.                                                | 2005 | Urology                        | Embase       | Duplication |
| Manikandan, R., Dorairajan, L. N., & Kum       | Current concepts in the management of pelvic fracture urethral distraction defects. Indian journal of urology.        | 2011 | Indian J. Urol.                | Embase       | Duplication |
| Martinez-Pineiro, J. A., Carcamo, P., Gar      | Excision and anastomotic repair for urethral stricture disease: Experience with 150 cases.                            | 1997 | Eur. Urol.                     | Embase       | Duplication |
| Meeks, J. J., Brandes, S. B., Morey, A. F.     | Urethroplasty for radiotherapy induced bulbomembranous strictures: A multi-institutional experience.                  | 2011 | J. Urol.                       | Embase       | Duplication |
| Meeks, J., Thom, M., Mehdiratta, N., et a      | Urethroplasty for radiotherapy-induced bulbomembranous strictures: A multi-institutional experience.                  | 2010 | J. Urol.                       | Embase       | Duplication |
| Mehrsai, A., Djaladat, H., Salem, S., et al    | Outcome of Buccal Mucosal Graft Urethroplasty for Long and Repeated Stricture Repair.                                 | 2007 | Urology                        | Embase       | Duplication |
| Miguel, C., Rafael, G., Joshi, D., et al.      | Ventral corporal body grafting for correcting severe penile curvature associated with single or two-stage hypo        | 2011 | J. Pediatr. Urol.              | Embase       | Duplication |
| Morey, A. F., & Kizer, W. S.                   | Proximal Bulbar Urethroplasty Via Extended Anastomotic Approach-What Are the Limits?                                  | 2006 | J. Urol.                       | Embase       | Duplication |
| Morey, A. F., & Mcaninch, J. W.                | Reconstruction of posterior urethral disruption injuries: Outcome analysis in 82 patients.                            | 1997 | J. Urol.                       | Embase       | Duplication |
| Morey, A. F., & Mcaninch, J. W.                | Reconstruction of traumatic posterior urethral strictures.                                                            | 1997 | Tech. Urol.                    | Embase       | Duplication |
| Morgia, G., Saita, A., Morana, F., et al.      | Endoprosthesis implantation in the treatment of recurrent urethral stricture: A multicenter study.                    | 1999 | J. Endourol.                   | Embase       | Duplication |
| Moudouni, S. M., Patard, J. J., Manunta,       | Early endoscopic realignment of post-traumatic posterior urethral disruption.                                         | 2001 | Urology                        | Embase       | Duplication |
| Mouraviev, V. B., Coburn, M., & Santucci       | The treatment of posterior urethral disruption associated with pelvic fractures: Comparative experience of ear        | 2005 | J. Urol.                       | Embase       | Duplication |
| Nelson, C. P., Bloom, D. A., Kinast, R., et    | Patient-reported sexual function after oral mucosa graft urethroplasty for hypospadias.                               | 2005 | Urology                        | Embase       | Duplication |
| Neerli, R. B., Koura, A. C., Ravish, I. R., et | Posterior urethral injury in male children: Long-term follow up.                                                      | 2008 | J. Pediatr. Urol.              | Embase       | Duplication |
| Neuhaus J, Dorschner W, Mondry J, et al        | Comparative anatomy of the male guinea-pig and human lower urinary tract: histomorphology and three-dime              | 2001 | Anat Histol Embryol.           | PubMed       | Duplication |
| Otgun, I., Karnak, I., Senocak, M. E., et a    | Late urodynamic findings after treating traumatic rupture of the posterior urethra in boys.                           | 2006 | BJU Int.                       | Embase       | Duplication |
| Palminteri, E., Berdondini, E., Shokeir, A.    | Two-sided bulbar urethroplasty using dorsal plus ventral oral graft: Urinary and sexual outcomes of a new tec         | 2011 | J. Urol.                       | Embase       | Duplication |
| Palminteri, E., Franco, G., Berdondini, E.     | Anterior urethroplasty and effects on sexual life: Which is the best technique?                                       | 2010 | Minerva Urol. Nefrol.          | Embase       | Duplication |
| Parker, W. R., Wheat, J., Montgomery, J.       | Urethral Diverticulum After Endoscopic Urethrotomy: Case Report.                                                      | 2007 | Urology                        | Embase       | Duplication |
| Perovic, S. V., & Djordjevic, M. L.            | A new approach in hypospadias repair.                                                                                 | 1998 | World J. Urol.                 | Embase       | Duplication |
| Perovic, S. V., Vukadinovic, V., Djordjevic    | The penile disassembly technique in hypospadias repair.                                                               | 1998 | BJU Int.                       | Embase       | Duplication |
| Pratap, A., Agrawal, C. S., Pandit, R. K.,     | Factors Contributing to a Successful Outcome of Combined Abdominal Transpubic Perineal Urethroplasty for              | 2006 | J. Urol.                       | Embase       | Duplication |
| Pratap, A., Agrawal, C. S., Tiwari, A., et a   | Complex Posterior Urethral Disruptions: Management by Combined Abdominal Transpubic Perineal Urethrop                 | 2006 | J. Urol.                       | Embase       | Duplication |
| Raber                                          | Dorsal Onlay Graft Urethroplasty Using Penile Skin or Buccal Mucosa for Repair of Bulbar Urethral Stricture:          | 2005 | Eur. Urol.                     | Google       | Duplication |
| Rao, H. S., Bhandari, M., & Dubey, D.          | Dorsal placement of the pedicled preputial/penile onlay flap for anterior urethral stricture: is it more logical?     | 2001 | Archivos espanoles de urologia | Embase       | Duplication |
| Rehman, J., Samadi, D., Ricciardi, R., Jr      | Early endoscopic realignment as primary therapy for complete posterior urethral disruptions.                          | 1998 | J. Endourol.                   | Embase       | Duplication |
| Ritchey, M. L., & Ribbeck, M.                  | Successful use of tunica vaginalis grafts for treatment of severe penile chordee in children.                         | 2003 | J. Urol.                       | Embase       | Duplication |
| Sahin, H., Bircan, M. K., Akay, A. F., et al   | Endoscopic treatment of complete posterior urethral obliteration.                                                     | 1998 | Acta Urol Belg.                | Embase       | Duplication |
| Santanelli, F., & Paolini, G.                  | Glans, urethra, and corporeal body reconstruction by free osteocutaneous forearm flap transfer.                       | 2003 | Ann. Plast. Surg.              | Embase       | Duplication |
| Santucci, R. A., Mario, L. A., & Mcaninch,     | Anastomotic urethroplasty for bulbar urethral stricture: Analysis of 168 patients.                                    | 2002 | J. Urol.                       | Embase       | Duplication |
| Schlomer, B. J., Dugi, D. D., III, Valadez,    | Correlation of Penile and Bulbospongiosus Measurements: Implications for Artificial Urinary Sphincter Cuff Pl         | 2010 | J. Urol.                       | Embase       | Duplication |
| Sedy J, Nanka O, Spackova J, et al.            | Clinical implications of a close vicinity of nervus dorsalis penis/clitoridis and os pubis.                           | 2008 | J. Sex. Med.                   | PubMed       | Duplication |
| Sengor, F., Gurdal, M., Tekin, A., et al.      | Neodymium:YAG visual laser ablation of the prostate: 7 Years of experience with 230 patients.                         | 2002 | J. Urol.                       | Embase       | Duplication |
| Shaeer, O. K. Z., & El-Sadat, A.               | Urethral substitution using vein graft for hypospadias repair.                                                        | 2006 | J. Pediatr. Urol.              | Embase       | Duplication |
| Sharma V, Kumar S, Mandal AK, et al.           | A study on sexual function of men with anterior urethral stricture before and after treatment.                        | 2011 | Urol. Int.                     | Other Search | Duplication |
| Sharma, V., Kumar, S., Mandal, A. K., et       | A study on sexual function of men with anterior urethral stricture before and after treatment.                        | 2011 | Urologia Internationalis       | Embase       | Duplication |
| Shenfeld, O. Z., Gofrit, O. N., Gdor Y., et    | Anastomotic urethroplasty for failed previously treated membranous urethral rupture.                                  | 2004 | Urology                        | Embase       | Duplication |
| Shenfeld, O. Z., Gofrit, O. N., Gdor Y., et    | The role of sildenafil in the treatment of erectile dysfunction in patients with pelvic fracture urethral disruption. | 2004 | J. Urol.                       | Embase       | Duplication |
| Shenfeld, O. Z., Kiselgorf, D., Gofrit, O. N   | The incidence and causes of erectile dysfunction after pelvic fractures associated with posterior urethral disr       | 2003 | J. Urol.                       | Embase       | Duplication |
| Sievert, K.-D., Amend, B., & Stenzl, A.        | Tissue Engineering for the Lower Urinary Tract: A Review of a State of the Art Approach.                              | 2007 | Eur. Urol.                     | Embase       | Duplication |
| Singh UP, Maheshwari R, Kumar V, et al.        | Impact on sexual function after reconstructive surgery for anterior urethral stricture disease.                       | 2010 | Indian J. Urol.                | Other Search | Duplication |
| Singh, U. P., Maheshwari, R., Kumar, V.,       | Impact on sexual function after reconstructive surgery for anterior urethral stricture disease.                       | 2010 | Indian J. Urol.                | Embase       | Duplication |
| Sofer, M., Beri, A., Matzkin, H., et al.       | Long-term results of immediate endoscopic realignment of complete posterior urethral disruption.                      | 2009 | J. Endourol.                   | Embase       | Duplication |

|                                                |                                                                                                                     |      |                             |              |             |
|------------------------------------------------|---------------------------------------------------------------------------------------------------------------------|------|-----------------------------|--------------|-------------|
| Talic, R. F.                                   | Transurethral electrovaporization-resection of the prostate using the "wing" cutting electrode: Preliminary res     | 1999 | Urology                     | Embase       | Duplication |
| Talug, C., Brown, E. T., Wilson, A. M., et al  | Traumatic complete urethral disruption: the West Virginia experience.                                               | 2010 | WV Med. J.                  | Embase       | Duplication |
| Tanello, M., Bettini, E., Griggi, S., et al.   | A rare case of penile fracture with complete urethral rupture during sexual intercourse.                            | 2005 | Arch. Ital. Urol. Androl.   | Embase       | Duplication |
| Tang, Y.-M., Chen, S.-J., Huang, L.-G., et al  | Chordee without hypospadias: Report of 79 Chinese prepubertal patients.                                             | 2007 | J. Androl.                  | Embase       | Duplication |
| Theodorou, C., Plastiras, D., Moutzouris,      | Combined reconstructive and prosthetic surgery in complicated lower urinary tract dysfunction.                      | 1997 | J. Urol.                    | Embase       | Duplication |
| Tiguert, R., Harb, J. F., Hurley, P. M., et al | Management of shotgun injuries to the pelvis and lower genitourinary system.                                        | 2000 | Urology                     | Embase       | Duplication |
| Turken, A., Senocak, M. E., Buyukpamuk         | Use of eccentric circummeatal-based flap with combined limited urethral mobilization technique for distal hyp       | 1999 | Plast. Reconstr. Surg.      | Embase       | Duplication |
| Uchida, T., Nakano, M., Shoji, S., et al.      | Ten-year biochemical disease-free survival after High Intensity Focused Ultrasound (HIFU) for localized pros        | 2009 | J. Urol.                    | Embase       | Duplication |
| Upadhyaya, M., & Freeman, N. V.                | Management of traumatic urethral disruption in children: Oman experience, 1988-2000.                                | 2002 | J. Pediatr. Surg.           | Embase       | Duplication |
| van Moorselaar RJ, Hartung R, Emberton         | Alfuzosin 10 mg once daily improves sexual function in men with lower urinary tract symptoms and concomita          | 2005 | BJU Int.                    | PubMed       | Duplication |
| Vandersteen, D. R., & Husmann, D. A.           | Late onset recurrent penile chordee after successful correction at hypospadias repair.                              | 1998 | J. Urol.                    | Embase       | Duplication |
| Vegh, A                                        | Two methods in the treatment of prostate cancer T1-T2.                                                              | 1997 | Acta Chir Hung              | Embase       | Duplication |
| Vesely, J., Hyza, P., Ranno, R., et al.        | New technique of total phalloplasty with reinnervated latissimus dorsi myocutaneous free flap in female-to-ma       | 2007 | Ann. Plast. Surg.           | Embase       | Duplication |
| Vicini, F. A., Kestin, L. L., & Martinez, A. A | Use of conformal high-dose rate brachytherapy for management of patients with prostate cancer: Optimizing           | 2000 | Tech. Urol.                 | Embase       | Duplication |
| Wang, P., Fan, M., Zhang, Y., et al.           | Modified Urethral Pull-Through Operation for Posterior Urethral Stricture and Long-Term Outcome.                    | 2008 | J. Urol.                    | Embase       | Duplication |
| Weiser, A. C., Franco, I., Herz, D. B., et al  | Single layered small intestinal submucosa in the repair of severe chordee and complicated hypospadias.              | 2003 | J. Urol.                    | Embase       | Duplication |
| Xie, H., Xu, Y.-M., Xu, X.-L., et al.          | Evaluation of erectile function after urethral reconstruction: A prospective study.                                 | 2009 | Asian J Androl.             | Embase       | Duplication |
| Yablon, C. M., Banner, M. P., Ramchanda        | Complications of prostate cancer treatment: Spectrum of imaging findings.                                           | 2004 | Radiographics               | Embase       | Duplication |
| Yang, S. S. D., Chen, S. C., Liu, S.-P., et    | Hydrodissection technique to preserve the thin distal urethra when correcting chordee without hypospadias.          | 2002 | J. Urol.                    | Embase       | Duplication |
| Yin, L., Li, Z., Kong, C., Yu, X., et al.      | Urethral pull-through operation for the management of pelvic fracture urethral distraction defects.                 | 2011 | Urology                     | Embase       | Duplication |
| Yuan, J.-B., Yang, L.-Y., Wang, Y.-H., Din     | Hyperbaric oxygen therapy for recovery of erectile function after posterior urethral reconstruction.                | 2011 | International Urology and N | Embase       | Duplication |
| Zhou, F.-J., Xiong, Y. H., Zhang, X. P., et    | Transperineal end-to-end anastomotic urethroplasty for traumatic posterior urethral disruption and strictures i     | 2002 | Asian J. Surg               | Embase       | Duplication |
| Zhou, Z.-S., Song, B., Jin, X.-Y., et al.      | Operative techniques of anastomotic posterior urethroplasty for traumatic posterior urethral strictures.            | 2007 | Chin. J. Traumatol.         | Embase       | Duplication |
| <b>Topic Not Anterior Urethroplasties</b>      |                                                                                                                     |      |                             |              |             |
| Hudak, S., Valadez, C., Terlecki, R., et al    | Impact of the 3.5 cm artificial urinary sphincter cuff in primary and revision surgery for male stress urinary inc  | 2011 | J. Urol.                    | Embase       | AUS         |
| Schlomer BJ, Dugi DD 3rd, Valadez C, et        | Correlation of penile and bulbospongiosus measurements: implications for artificial urinary sphincter cuff plac     | 2010 | J. Urol.                    | PubMed       | AUS         |
| Schlomer, B., Valadez, C., Dugi, D., et al     | Correlation of penile shaft and urethral girth measurements: Implications for artificial urinary sphincter cuff pla | 2009 | Neurourol. Urodyn.          | Embase       | AUS         |
| Abdel-Basir Sayed M.                           | Bladder neck resection with preservation of antegrade ejaculation: Basir technique.                                 | 2003 | J. Endourol.                | PubMed       | BPH         |
| Albertsen, P.C.                                | Urologic 'nuisances': How to work up and relieve men's symptoms.                                                    | 1997 | Geriatrics                  | Embase       | BPH         |
| Alhasan, S. U., Aji, S. A., Mohammed, A.       | Transurethral resection of the prostate in Northern Nigeria, problems and prospects.                                | 2008 | BMC Urol.                   | Embase       | BPH         |
| Andriole G, Bruchovsky N, Chung LW, et         | Dihydrotestosterone and the prostate: the scientific rationale for 5alpha-reductase inhibitors in the treatment     | 2004 | J. Urol.                    | PubMed       | BPH         |
| Autorino, R., De Sio, M., & D'Armiento, M      | Bipolar plasmakinetic technology for the treatment of symptomatic benign prostatic hyperplasia: Evidence be         | 2007 | BJU Int.                    | Embase       | BPH         |
| Bach T, Netsch C, Pohlmann L, et al.           | Thulium:YAG vapoenucleation in large volume prostates.                                                              | 2011 | J. Urol.                    | PubMed       | BPH         |
| Barry MJ.                                      | Evaluation of symptoms and quality of life in men with benign prostatic hyperplasia.                                | 2001 | Urology                     | PubMed       | BPH         |
| Bechara A, Romano S, Casabé A, et al.          | Comparative efficacy assessment of tamsulosin vs. tamsulosin plus tadalafil in the treatment of LUTS/BPH. P         | 2008 | J. Sex. Med.                | PubMed       | BPH         |
| Bereczky, Z., Bolus, M., Chetty, P., et al.    | Management of benign prostatic hyperplasia - South African urological association guideline.                        | 2006 | S. Afr. Med. J.             | Embase       | BPH         |
| Bouchier-Hayes DM, Van Appledorn S, B          | A randomized trial of photoselective vaporization of the prostate using the 80-W potassium-titanyl-phosphate        | 2010 | BJU Int.                    | PubMed       | BPH         |
| Buchholz, N. N. P., Andrews, H. O., & Pla      | Transurethral ethanol ablation of prostate.                                                                         | 2004 | J. Endourol.                | Embase       | BPH         |
| Cahill, D.                                     | The GP's role in lower urinary tract obstruction.                                                                   | 2005 | Practitioner                | Embase       | BPH         |
| Chahal R, Sundaram SK, Gogoi NK.               | Assessment of voiding outcome, sexual function and quality of life two years following KTP/YAG hybrid laser         | 2000 | Urol. Int.                  | PubMed       | BPH         |
| Chen, C.-H., Chiang, P.-H., Chuang, Y.-C       | Preliminary Results of Prostate Vaporization in the Treatment of Benign Prostatic Hyperplasia by Using a 200        | 2010 | Urology                     | Embase       | BPH         |
| Chin PT, Bolton DM, Jack G, et al.             | Prostatic urethral lift: two-year results after treatment for lower urinary tract symptoms secondary to benign p    | 2012 | Urology                     | Other Search | BPH         |
| Choi, B., Tabatabaei, S., Bachmann, A., &      | GreenLight HPS 120-W Laser for Benign Prostatic Hyperplasia: Comparative Complications and Technical R              | 2008 | Eur. Urol.                  | Embase       | BPH         |
| Choi, W. S., Song, S. H., Ha, S. B., et al.    | Outcome and complications of 323 cases with 120 W Greenlight(trademark) high-performance system for ph              | 2011 | Urology                     | Embase       | BPH         |
| Cioanta, I., & Muschter, R.                    | Water-induced thermotherapy for benign prostatic hyperplasia.                                                       | 2000 | Tech. Urol.                 | Embase       | BPH         |

|                                                |                                                                                                                     |      |                             |        |     |
|------------------------------------------------|---------------------------------------------------------------------------------------------------------------------|------|-----------------------------|--------|-----|
| de Wildt MJ, Wagrell L, Larson TR, et al.      | Clinical results of microwave thermotherapy for benign prostatic hyperplasia.                                       | 2000 | J. Endourol.                | PubMed | BPH |
| Demir O, Murat N, Aslan G, et al.              | Effect of doxazosin with and without rho-kinase inhibitor on human corpus cavernosum smooth muscle in the           | 2006 | J. Urol.                    | PubMed | BPH |
| Djakovic, N., Oeztuerk, A., Stredele, R.,      | Inlay-onlay urethroplasty in severe hypospadias.                                                                    | 2009 | J. Urol.                    | Embase | BPH |
| Douglass, M. A., & Lin, J. C.                  | Update on the treatment of benign prostatic hyperplasia.                                                            | 2005 | Formulary                   | Embase | BPH |
| Eliasson, T., & Wagrell, L.                    | New technologies for the surgical management of symptomatic benign prostatic enlargement: Tolerability and          | 2000 | Curr. Opin. Urol.           | Embase | BPH |
| Eliasson, T., Abramsson, L., & Damber, J       | Importance of thermal dose and antenna location in transurethral microwave thermotherapy for benign prosta          | 1998 | J. Endourol.                | Embase | BPH |
| Elliott SP, Gulati M, Pasta DJ, et al.         | Obstructive lower urinary tract symptoms correlate with erectile dysfunction.                                       | 2004 | Urology                     | PubMed | BPH |
| Erol A, Cam K, Tekin A, et al.                 | High power diode laser vaporization of the prostate: preliminary results for benign prostatic hyperplasia.          | 2009 | J. Urol.                    | PubMed | BPH |
| Flax, S.                                       | TUNA as a treatment for benign prostatic hypertrophy: A kinder, gentler treatment.                                  | 1999 | Mature Med. Can.            | Embase | BPH |
| Gilling PJ, Aho TF, Frampton CM, et al.        | Holmium laser enucleation of the prostate: results at 6 years.                                                      | 2008 | Eur. Urol.                  | PubMed | BPH |
| Gupta, N. P., & Anand, A.                      | Comparison of TURP, TUVRP, and HoLEP.                                                                               | 2009 | Curr. Prostate Rep.         | Embase | BPH |
| Gur S, Kadowitz PJ, Hellstrom WJ.              | Guide to drug therapy for lower urinary tract symptoms in patients with benign prostatic obstruction : implicati    | 2008 | Drugs                       | PubMed | BPH |
| Hamann MF, Naumann CM, Seif C, et al.          | Functional outcome following photoselective vaporisation of the prostate (PVP): urodynamic findings within 1        | 2008 | Eur. Urol.                  | PubMed | BPH |
| Hammadeh MY, Madaan S, Hines J, et al          | 5-year outcome of a prospective randomized trial to compare transurethral electrovaporization of the prostate       | 2003 | Urology                     | PubMed | BPH |
| Hammadeh MY, Madaan S, Singh M, et al          | Two-year follow-up of a prospective randomised trial of electrovaporization versus resection of prostate.           | 1998 | Eur. Urol.                  | PubMed | BPH |
| Hammadeh, M. Y., & Philp, T.                   | Transurethral electrovaporization of the prostate (TUVP) is effective, safe and durable.                            | 2003 | Prostate Cancer Prostatic D | Embase | BPH |
| Hill, B., Belville, W., Bruskwewitz, R., Issa, | Transurethral needle ablation versus transurethral resection of the prostate for the treatment of symptomatic       | 2004 | J. Urol.                    | Embase | BPH |
| Höfner K, Claes H, De Reijke TM, et al.        | Tamsulosin 0.4 mg once daily: effect on sexual function in patients with lower urinary tract symptoms sugges        | 1999 | Eur. Urol.                  | PubMed | BPH |
| Jackson G.                                     | Male lower urinary tract symptoms and sildenafil.                                                                   | 2007 | Int. J. Clin. Pract.        | PubMed | BPH |
| Kavoussi PK, Hermans MR.                       | Maintenance of erectile function after photoselective vaporization of the prostate for obstructive benign prosta    | 2008 | J. Sex. Med.                | PubMed | BPH |
| Kaya C, Ilktac A, Gokmen E, et al.             | The long-term results of transurethral vaporization of the prostate using plasmakinetic energy.                     | 2007 | BJU Int.                    | PubMed | BPH |
| Kim, M., Park, J. H., Lee, C. J., et al.       | The efficacy and safety of photoselective vaporization of the prostate(PVP) for the treatment of benign prosta      | 2009 | Neurourol. Urodyn.          | Embase | BPH |
| Kok ET, Schouten BW, Bohnen AM, et al          | Risk factors for lower urinary tract symptoms suggestive of benign prostatic hyperplasia in a community base        | 2009 | J. Urol.                    | PubMed | BPH |
| Kursh ED, Concepcion R, Chan S, et al.         | Interstitial laser coagulation versus transurethral prostate resection for treating benign prostatic obstruction: a | 2003 | Urology                     | PubMed | BPH |
| Lapitan MC, Acepacion V, Mangubat J.           | A comparative study on the safety and efficacy of tamsulosin and alfuzosin in the management of symptomat           | 2005 | J. Int. Med. Res.           | PubMed | BPH |
| Liao LM, Shi BY, Liang CQ, et al.              | Evaluation for Madigan's prostatectomy in patients with benign prostatic hyperplasia.                               | 2001 | Asian J Androl.             | PubMed | BPH |
| Liu, C.-K., Lee, W.-K., Ko, M.-C., et al.      | Transurethral RollerLoop vapor resection of prostate for treatment of symptomatic benign prostatic hyperplas        | 2006 | Scand. J. Urol. Nephrol.    | Embase | BPH |
| Lojanapiwat B, Permpongkosol S.                | The efficacy and safety of oral Tamsulosin controlled absorption system (OCAS) for the treatment of lower ur        | 2011 | Int. Braz. J. Urol.         | PubMed | BPH |
| Lourenco, T., Pickard, R., Vale, L., et al.    | Alternative approaches to endoscopic ablation for benign enlargement of the prostate: Systematic review of r        | 2008 | Br. Med. J.                 | Embase | BPH |
| Lynch, M. J.                                   | Transurethral resection of the prostate stands accused of causing impotence in patients: Should it be found c       | 2010 | BJU Int.                    | Embase | BPH |
| MacDonald D, McNicholas TA.                    | Drug treatments for lower urinary tract symptoms secondary to bladder outflow obstruction: focus on quality c       | 2003 | Drugs                       | PubMed | BPH |
| Macek, P., Patel, D., & Stricker, P.           | Assessing and managing benign prostatic hyperpasia.                                                                 | 2005 | Med Today                   | Embase | BPH |
| Malek RS, Kuntzman RS, Barrett DM.             | High power potassium-titanyl-phosphate laser vaporization prostatectomy.                                            | 2000 | J. Urol.                    | PubMed | BPH |
| Marcello, L., Giuseppe, S., Massimo, C.,       | Short-term outcomes of photoselective vaporization of prostate with 120 watt lithium triborate laser. Operative     | 2010 | Neurourol. Urodyn.          | Embase | BPH |
| Marszalek, M., Ponholzer, A., Pusman, M        | Transurethral Resection of the Prostate.                                                                            | 2009 | Eur. Urol.                  | Embase | BPH |
| Miller, S. W., & Miller, M. S.                 | Urological disorders in men: Urinary incontinence and benign prostatic hyperplasia                                  | 2011 | J. Pharm. Pract.            | Embase | BPH |
| Mobley, D. F., & Baum, N.                      | Medical management of benign prostatic hyperplasia in older adults.                                                 | 2004 | Geriatr. Aging              | Embase | BPH |
| Montorsi F, Naspro R, Salonia A, et al.        | Holmium laser enucleation versus transurethral resection of the prostate: results from a 2-center, prospective      | 2004 | J. Urol.                    | PubMed | BPH |
| Naspro R, Suardi N, Salonia A, et al.          | Holmium laser enucleation of the prostate versus open prostatectomy for prostates >70 g: 24-month follow-u          | 2006 | Eur. Urol.                  | PubMed | BPH |
| Neal, R. H., & Keister, D.                     | What's best for your patient with BPH?                                                                              | 2009 | J. Fam. Pract.              | Embase | BPH |
| O'Leary, M. P.                                 | Treatment and pharmacologic management of BPH in the context of common comorbidities.                               | 2006 | Am. J. Managed Care         | Embase | BPH |
| Patankar, S., Rasal, D., Shah, R., et al.      | Comparison between plasmakinetic resection of prostate and monopolar TURP: A prospective randomized tr              | 2011 | Urology                     | Embase | BPH |
| Perlmutter, A. P., & Vallancien, G.            | Thick loop transurethral resection of the prostate.                                                                 | 1999 | Eur. Urol.                  | Embase | BPH |
| Roehrborn, C. G., Issa, M. M., Bruskwewitz     | Transurethral needle ablation for benign prostatic hyperplasia: 12- Month results of a prospective, multicente      | 1998 | Urology                     | Embase | BPH |
| Roehrborn, C., Eure, G., Flanagan, M., et al   | A prospective multi-center study of the efficacy and safety of the AMS green light laser HPS in men with male       | 2011 | Urology                     | Embase | BPH |

|                                                  |                                                                                                                   |      |                            |        |         |
|--------------------------------------------------|-------------------------------------------------------------------------------------------------------------------|------|----------------------------|--------|---------|
| Ronzoni G, De Vecchis M.                         | Preservation of anterograde ejaculation after transurethral resection of both the prostate and bladder neck.      | 1998 | BJU Int.                   | PubMed | BPH     |
| Rosario DJ, Woo H, Potts KL, et al.              | Safety and efficacy of transurethral needle ablation of the prostate for symptomatic outlet obstruction.          | 1997 | BJU Int.                   | PubMed | BPH     |
| Rosen RC.                                        | Assessment of sexual dysfunction in patients with benign prostatic hyperplasia.                                   | 2006 | BJU Int.                   | PubMed | BPH     |
| Ruzić B, Trnski D, Kraus O, et al.               | New modification of transurethral incision of the prostate in surgical treatment of bladder outlet obstruction: p | 2002 | Croat. Med. J.             | PubMed | BPH     |
| Ruzic, B., Trnski, D., Kraus, O., et al.         | Transurethral incision of the prostate: An objective and subjective evaluation of efficacy during nine-year follo | 2003 | Acta Clin Croat.           | Embase | BPH     |
| Samli, M. M., & Dincel, C.                       | Terazosin and doxazosin in the treatment of BPH: Results of a randomized study with crossover in non-respc        | 2004 | Urologia Internationalis   | Embase | BPH     |
| Seftel A.                                        | Alfuzosin 10 mg once daily improves sexual function in men with lower urinary tract symptoms and concomita        | 2005 | J. Urol.                   | PubMed | BPH     |
| Seftel AD.                                       | Association between lower urinary tract symptoms and erectile dysfunction.                                        | 2005 | J. Urol.                   | PubMed | BPH     |
| Seki, N., & Naito, S.                            | Laser prostatectomy as a treatment option for BPH: HoLEP versus PVP.                                              | 2010 | Int. J. Urol.              | Embase | BPH     |
| Sengör F, Gürdal M, Tekin A, et al.              | Neodymium:YAG visual laser ablation of the prostate: 7 years of experience with 230 patients.                     | 2002 | J. Urol.                   | PubMed | BPH     |
| Shore, N.                                        | NX-1207: A novel investigational drug for the treatment of benign prostatic hyperplasia.                          | 2010 | Expert Opin. Invest. Drugs | Embase | BPH     |
| Steele GS, Sleep DJ.                             | Transurethral needle ablation of the prostate: a urodynamic based study with 2-year followup.                     | 1997 | J. Urol.                   | PubMed | BPH     |
| Strom, K. H., Gu, X., Spaliviero, M., et al.     | Perioperative and delayed adverse events of greenlight HPS(trademark) laser photoselective vaporization pr        | 2010 | J. Endourol.               | Embase | BPH     |
| Strom, K. H., Xiao, G., Spaliviero, M., et al.   | Incidence, management and prevention of peri-operative and delayed adverse events of greenlight HPS lase          | 2010 | Lasers Surg. Med.          | Embase | BPH     |
| Talic RF.                                        | Transurethral electrovaporization-resection of the prostate using the wing" cutting electrode: preliminary resu   | 1999 | Urology                    | PubMed | BPH     |
| Te, A. E., Santarosa, R., & Kaplan, S. A.        | Electrovaporization of the prostate: Electrosurgical modification of standard transurethral resection in 93 patie | 1997 | J. Endourol.               | Embase | BPH     |
| Teillac P.                                       | Relief of BPO or improvement in quality of life?                                                                  | 1998 | Eur. Urol.                 | PubMed | BPH     |
| Tiwari, A.                                       | Advances in the development of hormonal modulators for the treatment of benign prostatic hyperplasia.             | 2007 | Expert Opin. Invest. Drugs | Embase | BPH     |
| Tiwari, A., Krishna, N. S., Nanda, K., et al.    | Benign prostatic hyperplasia: An insight into current investigational medical therapies.                          | 2005 | Expert Opin. Invest. Drugs | Embase | BPH     |
| Vallancien G, Emberton M, Harving N, et al.      | Sexual dysfunction in 1,274 European men suffering from lower urinary tract symptoms.                             | 2003 | J. Urol.                   | PubMed | BPH     |
| Ventura, S., Oliver, V. L., White, C. et al.     | Novel drug targets for the pharmacotherapy of benign prostatic hyperplasia (BPH).                                 | 2011 | Br. J. Pharmacol.          | Embase | BPH     |
| Westenberg, A., Gilling, P., Kennett, K., et al. | Holmium laser resection of the prostate versus transurethral resection of the prostate: Results of a randomize    | 2004 | J. Urol.                   | Embase | BPH     |
| Wilson LC, Gilling PJ, Williams A, et al.        | A randomised trial comparing holmium laser enucleation versus transurethral resection in the treatment of pro     | 2006 | Eur. Urol.                 | PubMed | BPH     |
| Xia, S.-J., Zhuo, J., Sun, X.-W., et al.         | Thulium Laser versus Standard Transurethral Resection of the Prostate: A Randomized Prospective Trial.            | 2008 | Eur. Urol.                 | Embase | BPH     |
| Xue, W., Pan, J., Chen, H., Chen, Q., et al.     | Goserelein acetate combined PKRP for benign prostatic hyperplasia in patients with high surgical risk.            | 2009 | J. Endourol.               | Embase | BPH     |
| Yang Q, Peters TJ, Donovan JL, et al.            | Transurethral incision compared with transurethral resection of the prostate for bladder outlet obstruction: a s  | 2001 | J. Urol.                   | PubMed | BPH     |
| Yang SS, Tsai YC, Chen JJ, et al.                | Modified transurethral incision of the bladder neck treating primary bladder neck obstruction in young men: a     | 2008 | Urol. Int.                 | PubMed | BPH     |
| Yu, C., Chu, S. K., & Man, C. W.                 | Effect of daily 0.5mg oral dutasteride on prostate volume reduction in chinese men with symptomatic benign        | 2010 | Int. J. Urol.              | Embase | BPH     |
| Clouston, D., Hall, A., & Lawrentschuk, N.       | Penile lichen sclerosus (balanitis xerotica obliterans).                                                          | 2011 | BJU Int.                   | Embase | BXO     |
| Das, S., & Tunuguntla, H. S.                     | Balanitis xerotica obliterans--a review.                                                                          | 2000 | World J. Urol.             | Embase | BXO     |
| Braga LH, Pippi Salle JL, Dave S, et al.         | Outcome analysis of severe chordee correction using tunica vaginalis as a flap in boys with proximal hypospa      | 2007 | J. Urol.                   | PubMed | Chordee |
| Decter RM.                                       | Chordee correction by corporal rotation: the split and roll technique.                                            | 1999 | J. Urol.                   | PubMed | Chordee |
| Hayn MH, Bellinger MF, Schneck FX.               | Small intestine submucosa as a corporal body graft in the repair of severe chordee.                               | 2009 | Urology                    | PubMed | Chordee |
| Morey, A. F.                                     | Fibrin glue for the suture-less correction of penile chordee: A pilot study in a rabbit model - Commentary. J     | 2006 | J. Urol.                   | Embase | Chordee |
| Onol, S. Y., Kurt, O., Polat, E. C., et al.      | Our experience in cordi without hypospadias: 102 cases.                                                           | 2010 | J. Sex. Med.               | Embase | Chordee |
| Ritchey ML, Ribbeck M.                           | Successful use of tunica vaginalis grafts for treatment of severe penile chordee in children.                     | 2003 | J. Urol.                   | PubMed | Chordee |
| Snodgrass, W. T.                                 | Management of penile curvature in children.                                                                       | 2008 | Curr. Opin. Urol.          | Embase | Chordee |
| Tang YM, Chen SJ, Huang LG, et al.               | Chordee without hypospadias: report of 79 Chinese prepubertal patients.                                           | 2007 | J. Androl.                 | PubMed | Chordee |
| Vandersteen DR, Husmann DA.                      | Late onset recurrent penile chordee after successful correction at hypospadias repair.                            | 1998 | J. Urol.                   | PubMed | Chordee |
| Yang SS, Chen SC, Liu SP, et al.                 | Hydrodissection technique to preserve the thin distal urethra when correcting chordee without hypospadias.        | 2002 | J. Urol.                   | PubMed | Chordee |
| Chen, G. L., & Berger, R. E.                     | Treatment of impotence resulting from internal urethrotomy.                                                       | 1997 | J. Urol.                   | Embase | DVIU    |
| Dogra, P. N., Aron, M., & Rajeev, T. P.          | Core through urethrotomy with the neodymium:YAG laser for posttraumatic obliterative strictures of the bulbo      | 1999 | J. Urol.                   | Embase | DVIU    |
| Hosseini, J., Mazloomfard, M. M., Razi, A.       | Direct vision internal urethrotomy: Routine or star-like incision?                                                | 2011 | Eur. Urol.                 | Embase | DVIU    |
| Jin, T., Li, H., Jiang, L.-H., et al.            | Safety and efficacy of laser and cold knife urethrotomy for urethral stricture.                                   | 2010 | Chin. Med. J.              | Embase | DVIU    |
| Sahin H, Bircan MK, Akay AF, et al.              | Endoscopic treatment of complete posterior urethral obliteration.                                                 | 1998 | Acta Urol Belg.            | PubMed | DVIU    |

|                                                    |                                                                                                                  |      |                              |              |                       |
|----------------------------------------------------|------------------------------------------------------------------------------------------------------------------|------|------------------------------|--------------|-----------------------|
| Yunas, M., Ullah, A. A., Rahman, A. U., et al.     | Outcome of optical internal urethrotomy in urethral structure: A prospective study.                              | 2006 | J. Postgrad. Med. Inst.      | Embase       | DVIU                  |
| Erickson BA, Granieri MA, Meeks JJ, et al.         | Prospective analysis of ejaculatory function after anterior urethral reconstruction.                             | 2010 | J. Urol.                     | PubMed       | Ejaculatory Disorders |
| Jannini, E. A., Simonelli, C., & Lenzi, A.         | Disorders of ejaculation.                                                                                        | 2002 | J. Endocrinol. Invest.       | Embase       | Ejaculatory Disorders |
| Eeg, K. R., & Khoury, A. E.                        | The exstrophy-epispadias complex.                                                                                | 2008 | Curr. Urol. Rep.             | Embase       | Epispadias            |
| El-Sherbiny MT, Hafez AT.                          | Complete repair of bladder exstrophy in boys: can hypospadias be avoided?                                        | 2005 | Eur. Urol.                   | PubMed       | Epispadias            |
| Gargollo, P.C., & Borer, J. G.                     | Contemporary outcomes in bladder exstrophy.                                                                      | 2007 | Curr. Opin. Urol.            | Embase       | Epispadias            |
| Hammouda, H. M.                                    | Results of complete penile disassembly for epispadias repair in 42 patients.                                     | 2003 | J. Urol.                     | Embase       | Epispadias            |
| Hammouda, H., Elgammal, M., Safwat, A              | The RESULTS of penile disassembly for Epispadias repair in 108 patients.                                         | 2010 | J. Urol.                     | Embase       | Epispadias            |
| Kureel SN, Gupta A, Kumar S, et al.                | A novel midline scroto-perineal approach facilitating innervation preserving sphincteroplasty and radical corp   | 2011 | Urology                      | PubMed       | Epispadias            |
| Mollard, P., Basset, T., & Mure, P. Y.             | Male epispadias: Experience with 45 cases.                                                                       | 1998 | J. Urol.                     | Embase       | Epispadias            |
| VanderBrink, B. A., Stock, J. A., & Hanna          | Esthetic Outcomes of Genitoplasty in Males Born With Bladder Exstrophy and Epispadias.                           | 2007 | J. Urol.                     | Embase       | Epispadias            |
| Woodhouse, C. R.                                   | Reconstruction of the penis in men born with epispadias and exstrophy.                                           | 2005 | Eur. J. Plast. Surg.         | Embase       | Epispadias            |
| Fu, Q., Bian, W., & Lv, J.                         | Bulbocavernosus muscle flap for the repair of vesicovaginal fistula.                                             | 2009 | Urologia Internationalis     | Embase       | Female                |
| Onol, S. Y., Onol, F. F., Kurt, O., et al.         | Update in first line treatment of female urethral stricture: Vaginal inlay urethroplasty.                        | 2010 | J. Sex. Med.                 | Embase       | Female                |
| Purohit, R., Blaivas, J., Tsui, J., Santos, J      | Dorsal buccal mucosal graft urethroplasty for treatment of female urethral strictures.                           | 2011 | Neurourol. Urodyn.           | Embase       | Female                |
| Vardi, Y., Salonia, A., Lowenstein, L., et al      | Should nerve-sparing procedures be reserved to men only?                                                         | 2008 | J. Sex. Med.                 | Embase       | Female                |
| Wu, J.-X., Li, B., Liu, T., et al.                 | Eighty-six cases of laparoscopic vaginoplasty using an ileal segment.                                            | 2009 | Chin. Med. J.                | Embase       | Female                |
| Xu, Z., & Fu, Q.                                   | Bulbocavernosus muscle flap in the repair of complicated vesicovaginal fistula.                                  | 2005 | Int. J. Urol.                | Embase       | Female                |
| Anikwe RM, Kamal BA, Hegazi MM, et al              | Anterior hypospadias. Is repair necessary with urination in a sitting or squatting position?                     | 2000 | Saudi Med. J.                | PubMed       | Hypospadias           |
| Asopa, H. S.                                       | Newer concepts in the management of hypospadias and its complications.                                           | 1998 | Annals of the Royal College  | Embase       | Hypospadias           |
| Baran CN, Tiftikcioglu YO, Ozdemir R, et al        | What is new in the treatment of hypospadias?                                                                     | 2004 | Plast. Reconstr. Surg.       | PubMed       | Hypospadias           |
| Chertin, B., Prat, D., & Shenfeld, O. Z.           | Outcome of pediatric hypospadias repair in adulthood.                                                            | 2010 | Open Access J. Urol.         | Embase       | Hypospadias           |
| Fuse, H., Akashi, T., Yasuda, K., et al.           | Tubularized incised plate urethroplasty for distal hypospadias, using overlapping dorsal subcutaneous flaps.     | ?    | International Urology and N  | Embase       | Hypospadias           |
| Gill NA, Hameed A.                                 | Management of hypospadias cripples with two-staged Bracka's technique.                                           | 2011 | J. Plast. Reconstr. Aesthet. | PubMed       | Hypospadias           |
| Holland, A. J. A., Smith, G. H. H., & Cass         | Clinical review of the "snodgrass" hypospadias repair.                                                           | 2000 | Aust New Zealand J. Surg     | Embase       | Hypospadias           |
| Hosseini, J., Arshadi, H., Kajbafzadeh, A.         | Tubularized incised plate urethroplasty for proximal hypospadias, report of 63 cases.                            | 2011 | Eur. Urol.                   | Embase       | Hypospadias           |
| Kolon TF, Gonzales ET Jr.                          | The dorsal inlay graft for hypospadias repair.                                                                   | 2000 | J. Urol.                     | PubMed       | Hypospadias           |
| Latifoğlu O, Yavuzer R, Unal S, et al.             | Surgical treatment of urethral fistulas following hypospadias repair.                                            | 2000 | Ann. Plast. Surg.            | PubMed       | Hypospadias           |
| Leslie, B., Weber, B., Romao, R., et al.           | An alternative for ventral lengthening in children with severe penile curvature that allows graft coverage durin | 2011 | J. Urol.                     | Embase       | Hypospadias           |
| MacEdo, A., Jr, Liguori, R., Ottoni, S. L., et al. | Long-term results with a one-stage complex primary hypospadias repair strategy (the three-in-one technique       | 2011 | J. Pediatr. Urol.            | Embase       | Hypospadias           |
| Miguel C, Rafael G, Joshi D, Yuval BY, et al       | Ventral corporal body grafting for correcting severe penile curvature associated with single or two-stage hypo   | 2011 | J. Pediatr. Urol.            | PubMed       | Hypospadias           |
| Nelson CP, Bloom DA, Kinast R, et al.              | Patient-reported sexual function after oral mucosa graft urethroplasty for hypospadias.                          | 2005 | Urology                      | PubMed       | Hypospadias           |
| Oeztuerk, A., Djakovic, N., Hadaschik, B.          | Hypospadias repair - Inlay-onlay urethroplasty.                                                                  | 2010 | Eur. Urol.                   | Embase       | Hypospadias           |
| Oeztuerk, A., Djakovic, N., Hadaschik, B.          | One stage urethroplasty in severe hypospadias - Buccal mucosa inlay with penile island skin flap onlay.          | 2010 | J. Pediatr. Urol.            | Embase       | Hypospadias           |
| Perovic SV, Djordjevic ML.                         | A new approach in hypospadias repair.                                                                            | 1998 | World J. Urol.               | PubMed       | Hypospadias           |
| Perovic SV, Vukadinovic V, Djordjevic ML           | The penile disassembly technique in hypospadias repair.                                                          | 1998 | BJU Int.                     | PubMed       | Hypospadias           |
| Shaer OK, El-Sadat A.                              | Urethral substitution using vein graft for hypospadias repair.                                                   | 2006 | J. Pediatr. Urol.            | Other Search | Hypospadias           |
| Snodgrass, W. T., & Nguyen, M. T.                  | Current technique of tubularized incised plate hypospadias repair.                                               | 2002 | Urology                      | Embase       | Hypospadias           |
| Türken A, Senocak ME, Büyükpamukçu                 | The use of eccentric circummeatal-based flap with combined limited urethral mobilization technique for distal    | 1999 | Plast. Reconstr. Surg.       | PubMed       | Hypospadias           |
| Wang, W.-W., Tu, X.-A., Deng, C.-H., et al.        | Long-term sexual activity status and influencing factors in men after surgery for hypospadias.                   | 2009 | Asian J Androl.              | Embase       | Hypospadias           |
| Weiser AC, Franco I, Herz DB, et al.               | Single layered small intestinal submucosa in the repair of severe chordee and complicated hypospadias.           | 2003 | J. Urol.                     | PubMed       | Hypospadias           |
| Alsaid B, Karam I, Bessede T, et al.               | Tridimensional computer-assisted anatomic dissection of posterolateral prostatic neurovascular bundles.          | 2010 | Eur. Urol.                   | PubMed       | Imaging               |
| Bertolotto, M., Serafini, G., Savoca, G., et al.   | Color Doppler US of the postoperative penis: Anatomy and surgical complications.                                 | 2005 | Radiographics                | Embase       | Imaging               |
| Chen L, Hu B, Feng C, et al.                       | Predictive value of penile dynamic colour duplex Doppler ultrasound parameters in patients with posttraumat      | 2011 | J. Int. Med. Res.            | PubMed       | Imaging               |
| Goldstein, I.                                      | Assessment of increase of blood flow to the glans penis using Forward Looking Infrared Thermography (FLIR        | 2010 | J. Sex. Med.                 | Embase       | Imaging               |

|                                                                         |                                                                                                                                                |      |                                      |              |                           |
|-------------------------------------------------------------------------|------------------------------------------------------------------------------------------------------------------------------------------------|------|--------------------------------------|--------------|---------------------------|
| Kirkham, A. P., Illing, R. O., Minhas, S., et al.                       | MR imaging of nonmalignant penile lesions.                                                                                                     | 2008 | Radiographics                        | Embase       | Imaging                   |
| Kostakopoulos, A., Makrychoritis, K., Dellaligi, A., & Karamanlidis, G. | Contribution of transcutaneous ultrasonography to the evaluation of urethral strictures.                                                       | 1998 | International Urology and Nephrology | Embase       | Imaging                   |
| Marinkovic SP, Badlani GH.                                              | Imaging of the lower urinary tract in adults.                                                                                                  | 2001 | J. Endourol.                         | PubMed       | Imaging                   |
| Mishra, S., Sharma, R., Garg, C. P., et al.                             | Preliminary safety and efficacy results with robotic high-intensity focused ultrasound : A single center Indian experience.                    | 2011 | Indian J. Urol.                      | Embase       | Imaging                   |
| Rove, K. O., Sullivan, K. F., & Crawford, H.                            | High-intensity Focused Ultrasound: Ready for Primetime.                                                                                        | 2010 | Urol. Clin. North Am.                | Embase       | Imaging                   |
| Williams, A. K., Martinez, C. H., Chalasani, N. P., et al.              | High-intensity focused ultrasound: Where are we and where to from here?                                                                        | 2010 | Expert Rev. Anticancer Ther.         | Embase       | Imaging                   |
| Yablon CM, Banner MP, Ramchandani P.                                    | Complications of prostate cancer treatment: spectrum of imaging findings.                                                                      | 2004 | Radiographics                        | PubMed       | Imaging                   |
| Conti, E., Fasolo, P. P., Lacquaniti, S., et al.                        | Contemporary implant of trans obturatory sling advance and inflatable penile prosthesis AMS CX 700.                                            | 2009 | Eur. Urol.                           | Embase       | IPP                       |
| Dhabuwala, C., Sheth, S., & Zamzow, B.                                  | Infection Rates of Rifampin/Gentamicin-Coated Titan Coloplast Penile Implants. Comparison with Inhibizone-coated implants.                     | 2011 | J. Sex. Med.                         | Embase       | IPP                       |
| Lee SW, Park BH, Lim JH, et al.                                         | Prevention of urethral stricture in insertion of an inflatable penile prosthesis.                                                              | 2008 | Int. J. Urol.                        | PubMed       | IPP                       |
| Park, J. K.                                                             | Complications of penile implantations.                                                                                                         | 2010 | J. Sex. Med.                         | Embase       | IPP                       |
| Kutzenberger, J., Domurath, B., & Zepke, K.                             | Sacral deafferentation in neurogenic detrusor overactivity in spinal cord injury and implant driven micturition.                               | 2011 | Urology                              | Embase       | Neurogenic Bladder        |
| Westney, O. L.                                                          | The neurogenic bladder and incontinent urinary diversion.                                                                                      | 2010 | Urol. Clin. North Am.                | Embase       | Neurogenic Bladder        |
| Al-Ba'adani TH, Al-Asbahi W, Al-Towaity Y.                              | Urethral stricture Yemen experience.                                                                                                           | 2010 | Int. Urol. Nephrol.                  | PubMed       | Not about ED              |
| Aslan, G., Karg, E., & Erdogan, B.                                      | Use of circular subcutaneous tissue flaps to prevent fistulas in urethroplasty.                                                                | 2001 | Ann. Plast. Surg.                    | Embase       | Not about ED              |
| Barbagli, G., Sansalone, S., Romano, G., et al.                         | Ventral onlay oral mucosal graft bulbar urethroplasty.                                                                                         | 2011 | BJU Int.                             | Embase       | Not about ED              |
| Rourke, K. F., & Jordan, G. H.                                          | Primary urethral reconstruction: The cost minimized approach to the bulbous urethral stricture.                                                | 2005 | J. Urol.                             | Embase       | Not about ED              |
| Theodorou C, Plastiras D, Moutzouris G.                                 | Combined reconstructive and prosthetic surgery in complicated lower urinary tract dysfunction.                                                 | 1997 | J. Urol.                             | PubMed       | Not about ED              |
| Chammas MF Jr, Gurunluoglu R, Carlsson A, et al.                        | Surgical debridement of mineral pitch and nonviable penile tissue using water-jet power: a preliminary report.                                 | 2009 | BJU Int.                             | PubMed       | Not about urethroplasties |
| Chertin B, Koulikov D, Hadas-Halpern I, et al.                          | Masculinizing genitoplasty in intersex patients.                                                                                               | 2005 | J. Urol.                             | PubMed       | Not about urethroplasties |
| Djavan, B., Fakhari, M., Shariat, S., et al.                            | A novel intraurethral prostatic bridge catheter for prevention of temporary prostatic obstruction following high intensity focused ultrasound. | 1999 | J. Urol.                             | Embase       | Not about urethroplasties |
| Djordjevic ML, Stanojevic D, Bizic M, et al.                            | Metoidioplasty as a single stage sex reassignment surgery in female transsexuals: Belgrade experience.                                         | 2009 | J. Sex. Med.                         | PubMed       | Not about urethroplasties |
| Ekman, P., Sjogren, L., Englund, G., et al.                             | Optimizing the therapeutic approach of transurethral alprostadil.                                                                              | 2000 | BJU Int.                             | Embase       | Not about urethroplasties |
| Evans KC, Peterson AC, Ruiz HE, et al.                                  | Use of oral ketoconazole to prevent postoperative erections following penile surgery.                                                          | 2004 | Int. J. Impot. Res.                  | PubMed       | Not about urethroplasties |
| Fu, H.                                                                  | An assessment of the efficacy and safety of sildenafil administered to patients with erectile dysfunction referred for urethroplasty.          | 2011 | J. Sex. Med.                         | Other Search | Not about urethroplasties |
| Gonzalez RR, Te AE.                                                     | Is there a role for urodynamics in chronic nonbacterial prostatitis?                                                                           | 2006 | Curr. Urol. Rep.                     | PubMed       | Not about urethroplasties |
| Granieri, M. A., Nuss, G. R., Zhao, L. C., et al.                       | How do men present with urethral stricture disease? The case for a disease specific instrument to measure urethral caliber.                    | 2011 | J. Urol.                             | Embase       | Not about urethroplasties |
| Gupta D, Bhardwaj M, Sharma S, et al.                                   | Long-term psychosocial adjustments, satisfaction related to gender and the family equations in disorders of sex development.                   | 2010 | Pediatr. Surg. Int.                  | PubMed       | Not about urethroplasties |
| Kajbafzadeh AM, Sina A, Payabvash S.                                    | Management of multiple failed repairs of the phallus using tissue expanders: long-term postpubertal results.                                   | 2007 | J. Urol.                             | PubMed       | Not about urethroplasties |
| Khoo EM, Tan HM, Low WY.                                                | Erectile dysfunction and comorbidities in aging men: an urban cross-sectional study in Malaysia.                                               | 2008 | J. Sex. Med.                         | PubMed       | Not about urethroplasties |
| Kondo H, Yamada T, Kanematsu M, et al.                                  | Embolization for massive urethral hemorrhage.                                                                                                  | 2007 | Abdom Imaging.                       | PubMed       | Not about urethroplasties |
| Krstić ZD, Smoljanić Z, Mićović Z, et al.                               | Surgical treatment of the Müllerian duct remnants.                                                                                             | 2001 | J. Pediatr. Surg.                    | PubMed       | Not about urethroplasties |
| Mazza ON, Cheliz GM.                                                    | Glanuloplasty with scrotal flap for partial penectomy.                                                                                         | 2001 | J. Urol.                             | PubMed       | Not about urethroplasties |
| Norredam M, Crosby S, Munarriz R, et al.                                | Urologic complications of sexual trauma among male survivors of torture.                                                                       | 2005 | Urology                              | PubMed       | Not about urethroplasties |
| Palmineri E, Berdondini E, Lazzeri M, et al.                            | Resurfacing and reconstruction of the glans penis.                                                                                             | 2007 | Eur. Urol.                           | PubMed       | Not about urethroplasties |
| Parker, J. L., Ekman, D. L., & Hayden, L.                               | Hysterectomy in a phenotypic male with advanced gonadal malignancy and intersex.                                                               | 2009 | Med J Aust                           | Embase       | Not about urethroplasties |
| Perovic SV, Djordjevic ML.                                              | Penile lengthening.                                                                                                                            | 2000 | BJU Int.                             | PubMed       | Not about urethroplasties |
| Pottek, T.                                                              | Illustrative cases of ED and Incontinence.                                                                                                     | 2009 | J. Men's Health                      | Embase       | Not about urethroplasties |
| Tewari A, Jhaveri J, Rao S, et al.                                      | Total reconstruction of the vesico-urethral junction.                                                                                          | 2008 | BJU Int.                             | PubMed       | Not about urethroplasties |
| Davis JW, Schellhammer PF, Schlossberger G, et al.                      | Conservative surgical therapy for penile and urethral carcinoma.                                                                               | 1999 | Urology                              | PubMed       | Penile Cancer             |
| Gulino G, Sasso F, Falabella R, et al.                                  | Distal urethral reconstruction of the glans for penile carcinoma: results of a novel technique at 1-year of follow-up.                         | 2007 | J. Urol.                             | PubMed       | Penile Cancer             |
| Joo, H. L., & Hoon, K.                                                  | Localized amyloidosis presenting with a penile mass: A case report.                                                                            | 2009 | Cases J.                             | Embase       | Penile Cancer             |
| O'Neil, B., Brant, W. O., Slack, S. D., et al.                          | Penile cancer: Contemporary considerations in management of local disease.                                                                     | 2011 | Curr. Urol.                          | Embase       | Penile Cancer             |
| Al-Shaiji, T. F., Amann, J., & Brock, G. B.                             | Fractured penis: Diagnosis and management.                                                                                                     | 2009 | J. Sex. Med.                         | Embase       | Penile Fracture           |
| Chung, C. H., Szeto, Y. K., & Lai, K. K.                                | "Fracture" of the penis: A case series.                                                                                                        | 2006 | Hong Kong Med. J.                    | Embase       | Penile Fracture           |



|                                               |                                                                                                                    |      |                                |              |                 |
|-----------------------------------------------|--------------------------------------------------------------------------------------------------------------------|------|--------------------------------|--------------|-----------------|
| Crnemarkovic, D., & Micic, S.                 | Sex-related penile injury-Our 5 years experience.                                                                  | 2010 | J. Sex. Med.                   | Embase       | Penile Fracture |
| Eke N.                                        | Urological complications of coitus.                                                                                | 2002 | BJU Int.                       | PubMed       | Penile Fracture |
| Fazeli-Matin, S., Montague, D. K., Angern     | Penile fracture after intracavernous injection therapy.                                                            | 1998 | J. Urol.                       | Embase       | Penile Fracture |
| Garaffa, G., Raheem, A. A., & Ralph, D.       | Penile fracture and penile reconstruction.                                                                         | 2011 | Curr. Urol. Rep.               | Embase       | Penile Fracture |
| Heng CT, Brooks AJ.                           | Penile fracture with complete urethral rupture.                                                                    | 2003 | Asian J. Surg.                 | PubMed       | Penile Fracture |
| Jagodic, K., Bizjak, I., Erklavec, M., et al. | Penile fracture: Our experiences and results.                                                                      | 2009 | J. Sex. Med.                   | Embase       | Penile Fracture |
| Koifman L, Barros R, Júnior RA, et al.        | Penile fracture: diagnosis, treatment and outcomes of 150 patients.                                                | 2010 | Urology                        | PubMed       | Penile Fracture |
| Morey, A. F.                                  | Long-term outcome of surgical treatment of penile fracture complicated by urethral rupture.                        | 2011 | J. Urol.                       | Embase       | Penile Fracture |
| Schmidt, S., Djakovic, N., Nyarangi-Dix,      | Penile fractures with concomitant urethral rupture.                                                                | 2009 | J. Sex. Med.                   | Embase       | Penile Fracture |
| Toit, Du, K., & Heyns, C                      | Penile fracture: Experience at tygerberg hospital and video recording of this uncommon pathology.                  | 2011 | J. Urol.                       | Embase       | Penile Fracture |
| Bhatt YC, Vyas KA, Srivastava RK, et al.      | Microneurovascular reimplantation in a case of total penile amputation.                                            | 2008 | Indian J. Plast. Surg.         | Other Search | Penile Injuries |
| Cline KJ, Mata JA, Venable DD, et al.         | Penetrating trauma to the male external genitalia.                                                                 | 1998 | J. Trauma                      | PubMed       | Penile Injuries |
| Crnemarkovic, D., Dragicevic, S., Micic, S    | Traumatic penile injury-10 yares experiance.                                                                       | 2010 | Eur. Urol.                     | Embase       | Penile Injuries |
| Gatek L, Darewicz B, Kudelski J, et al.       | Microsurgical replantation of sexual organs in three patients.                                                     | 2002 | Scand. J. Urol. Nephrol.       | PubMed       | Penile Injuries |
| Gyan S, Sushma S, Maneesh S, et al.           | Successful microsurgical penile replantation following self amputation in a schizophrenic patient.                 | 2010 | Indian J. Urol.                | Other Search | Penile Injuries |
| Jezior JR, Brady JD, Schlossberg SM.          | Management of penile amputation injuries.                                                                          | 2001 | World J. Surg.                 | PubMed       | Penile Injuries |
| Kunkle, D. A., Lebed, B. D., Mydlo, J. H.,    | Evaluation and management of gunshot wounds of the penis: 20-Year experience at an urban trauma center.            | 2008 | J. Trauma Inj. Infect. Crit. C | Embase       | Penile injuries |
| Pei GX, Li K, Xie C.                          | Reconstruction of the penis after severe injury.                                                                   | 1998 | Injury                         | PubMed       | Penile Injuries |
| Razzaghi, M., Rezaei, A., Mohammadhos         | Successful macro-surgical reimplantation of an amputated penis.                                                    | 2009 | Urology                        | Embase       | Penile Injuries |
| Salem HK, Mostafa T.                          | Primary anastomosis of the traumatically amputated penis.                                                          | 2009 | Andrologia.                    | PubMed       | Penile Injuries |
| Aköz T, Kargi E.                              | Phalloplasty in a female-to-male transsexual using a double-pedicle composite groin flap.                          | 2002 | Ann. Plast. Surg.              | PubMed       | Phalloplasty    |
| Felici, N., & Felici, A.                      | A new phalloplasty technique: The free anterolateral thigh flap phalloplasty.                                      | 2006 | J. Plast. Reconstr. Aesthet.   | Embase       | Phalloplasty    |
| Gil, A. O., Pompeo, A. C. L., & Arap, S.      | Penile preservation in verrucous carcinoma.                                                                        | 2001 | Int. Braz. J. Urol.            | Embase       | Phalloplasty    |
| Khoury RK, Young VL, Casoli VM.               | Long-term results of total penile reconstruction with a prefabricated lateral arm free flap.                       | 1998 | J. Urol.                       | PubMed       | Phalloplasty    |
| Lin CT, Chen LW.                              | Using a free thoracodorsal artery perforator flap for phallic reconstruction--a report of surgical technique.      | 2009 | J. Plast. Reconstr. Aesthet.   | PubMed       | Phalloplasty    |
| Morel Journel, N., Courtois, F., Brassard.    | Surgical techniques in phalloplasty: Comparative success.                                                          | 2009 | J. Sex. Med.                   | Embase       | Phalloplasty    |
| Rubino C, Figus A, Dessy LA, et al.           | Innervated island pedicled anterolateral thigh flap for neo-phallic reconstruction in female-to-male transsexual   | 2009 | J. Plast. Reconstr. Aesthet.   | PubMed       | Phalloplasty    |
| Santanelli, F., & Scuderi, N.                 | Neophalloplasty in female-to-male transsexuals with the island tensor fasciae latae flap.                          | 2000 | Plast. Reconstr. Surg.         | Embase       | Phalloplasty    |
| Sasaki K, Nozaki M, Morioka K, et al.         | Penile reconstruction: combined use of an innervated forearm osteocutaneous flap and big toe pulp.                 | 1999 | Plast. Reconstr. Surg.         | PubMed       | Phalloplasty    |
| Vesely J, Hyza P, Ranno R, et al.             | New technique of total phalloplasty with reinnervated latissimus dorsi myocutaneous free flap in female-to-ma      | 2007 | Ann. Plast. Surg.              | PubMed       | Phalloplasty    |
| Yang M, Zhao M, Li S, et al.                  | Penile reconstruction by the free scapular flap and malleable penis prosthesis.                                    | 2007 | Ann. Plast. Surg.              | PubMed       | Phalloplasty    |
| Alsaid B, Bessede T, Diallo D, et al.         | Division of autonomic nerves within the neurovascular bundles distally into corpora cavernosa and corpus sp        | 2011 | Eur. Urol.                     | PubMed       | Physiology      |
| Alsaid B, Moszkowicz D, Peschard F, et        | Autonomic-somatic communications in the human pelvis: computer-assisted anatomic dissection in male and            | 2011 | J. Anat.                       | PubMed       | Physiology      |
| Andersson KE.                                 | The importance of the cholinergic system in neurourology.                                                          | 1998 | Eur. Urol.                     | PubMed       | Physiology      |
| Atala, A.                                     | Advances in tissue and organ replacement.                                                                          | 2008 | Curr. Stem Cell Res. Ther.     | Embase       | Physiology      |
| Chavalmane AK, Comeglio P, Morelli A, e       | Sex steroid receptors in male human bladder: expression and biological function.                                   | 2010 | J. Sex. Med.                   | PubMed       | Physiology      |
| Da Silva, E. A., & Sampaio, F. J. B.          | Urethral extensibility applied to reconstructive surgery.                                                          | 2002 | J. Urol.                       | Embase       | Physiology      |
| Filippi S, Morelli A, Sandner P, et al.       | Characterization and functional role of androgen-dependent PDE5 activity in the bladder.                           | 2007 | Endocrinology                  | PubMed       | Physiology      |
| Fu, Q., & Cao, Y.-L.                          | Use of tissue engineering in treatment of the male genitourinary tract abnormalities.                              | 2010 | J. Sex. Med.                   | Embase       | Physiology      |
| Neuhaus J, Dorschner W, Mondry J, et a        | Comparative anatomy of the male guinea-pig and human lower urinary tract: histomorphology and three-dime           | 2001 | Anat Histol Embryol.           | PubMed       | Physiology      |
| Ozdemir MB, Eskicorapci SY, Baydar DE         | A cadaveric histological investigation of the prostate with three-dimensional reconstruction for better results in | 2007 | Prostate Cancer Prostatic D    | PubMed       | Physiology      |
| Schwinn DA, Price DT, Narayan P.              | alpha1-Adrenoceptor subtype selectivity and lower urinary tract symptoms.                                          | 2004 | Mayo Clinic Proc.              | PubMed       | Physiology      |
| Sedy, J., Nanka, O., Spackova, J., et al.     | Clinical implications of a close vicinity of nervus dorsalis penis/ clitoridis and os pubis.                       | 2008 | J. Sex. Med.                   | Embase       | Physiology      |
| Shokeir, A. A., Harraz, A. M., & El-Din, A.   | Tissue engineering and stem cells: Basic principles and applications in urology.                                   | 2010 | Int. J. Urol.                  | Embase       | Physiology      |
| Sievert KD, Amend B, Stenzl A.                | Tissue engineering for the lower urinary tract: a review of a state of the art approach.                           | 2007 | Eur. Urol.                     | PubMed       | Physiology      |

|                                                  |                                                                                                                                                                                               |      |                                    |        |                 |
|--------------------------------------------------|-----------------------------------------------------------------------------------------------------------------------------------------------------------------------------------------------|------|------------------------------------|--------|-----------------|
| Yucel S, Baskin LS.                              | Identification of communicating branches among the dorsal, perineal and cavernous nerves of the penis.                                                                                        | 2003 | J. Urol.                           | PubMed | Physiology      |
| Tuygun, C., Guvercini, M., Conkbayir, I.         | Post-surgical high-flow priapism treated by embolization.                                                                                                                                     | 2007 | Int. J. Urol.                      | Embase | Priapism        |
| Aaronson, D. S., Yamasaki, I., Gottschalk        | Salvage permanent perineal radioactive-seed implantation for treating recurrence of localized prostate adenocarcinoma.                                                                        | 2009 | BJU Int.                           | Embase | Prostate Cancer |
| Ahmed, H. U., Zacharakis, E., Dudderidge         | High-intensity-focused ultrasound in the treatment of primary prostate cancer: the first UK series.                                                                                           | 2009 | Br. J. Cancer                      | Embase | Prostate Cancer |
| Ahmed, S., & Davies, J.                          | Managing the complications of prostate cryosurgery.                                                                                                                                           | 2005 | BJU Int.                           | Embase | Prostate Cancer |
| Ahmed, S., Lindsey, B., & Davies, J.             | Salvage cryosurgery for locally recurrent prostate cancer following radiotherapy.                                                                                                             | 2005 | Prostate Cancer Prostatic Dis.     | Embase | Prostate Cancer |
| Akduman, B., Barqawi, A. B., & Crawford          | Minimally invasive surgery in prostate cancer: Current and future perspectives.                                                                                                               | 2005 | Cancer J.                          | Embase | Prostate Cancer |
| Anderson, J.                                     | Quality of life aspects of treatment options for localized and locally advanced prostate cancer.                                                                                              | 2001 | Eur. Urol.                         | Embase | Prostate Cancer |
| Astrom, L., Pedersen, D., Mercke, C., Ho         | Long-term outcome of high dose rate brachytherapy in radiotherapy of localised prostate cancer.                                                                                               | 2005 | Radiother. Oncol.                  | Embase | Prostate Cancer |
| Ataman, F., Zurlo, A., Artignan, X., et al.      | Late toxicity following conventional radiotherapy for prostate cancer: Analysis of the EORTC trial 22863.                                                                                     | 2004 | Eur. J. Cancer                     | Embase | Prostate Cancer |
| Augustin H, Pummer K, Daghofer F, et al          | Patient self-reporting questionnaire on urological morbidity and bother after radical retropubic prostatectomy.                                                                               | 2002 | Eur. Urol.                         | PubMed | Prostate Cancer |
| Aus, G., Pileblad, E., & Hugosson, J.            | Cryosurgical ablation of the prostate: 5-Year follow-up of a prospective study.                                                                                                               | 2002 | Eur. Urol.                         | Embase | Prostate Cancer |
| Babaian, R. J., Donnelly, B., Bahn, D., et       | Best Practice Statement on Cryosurgery for the Treatment of Localized Prostate Cancer.                                                                                                        | 2008 | J. Urol.                           | Embase | Prostate Cancer |
| Bastian, P. J.                                   | High-intensity focused ultrasound for localized prostate cancer: Ready for prime time?                                                                                                        | 2010 | Eur. Urol.                         | Embase | Prostate Cancer |
| Beard CJ, Propert KJ, Rieker PP, et al.          | Complications after treatment with external-beam irradiation in early-stage prostate cancer patients: a prospective study.                                                                    | 1997 | J. Clin. Oncol.                    | PubMed | Prostate Cancer |
| Beltramo, G., Bergantin, A., Locatelli, F.,      | Stereotactic hypofractionated body radiotherapy: An emerging treatment approach for clinically localized prostate cancer.                                                                     | 2010 | Radiother. Oncol.                  | Embase | Prostate Cancer |
| Benoit RM, Naslund MJ, Cohen JK.                 | A comparison of complications between ultrasound-guided prostate brachytherapy and open prostate brachytherapy.                                                                               | 2000 | Int. J. Radiat. Oncol. Biol. Phys. | PubMed | Prostate Cancer |
| Benoit RM, Naslund MJ, Cohen JK.                 | Complications after radical retropubic prostatectomy in the medicare population.                                                                                                              | 2000 | Urology                            | PubMed | Prostate Cancer |
| Bott, S. R. J., Birtle, A. J., Taylor, C. J., et | Prostate cancer management: (1) An update on localised disease.                                                                                                                               | 2003 | Postgrad. Med. J.                  | Embase | Prostate Cancer |
| Brodak, M., Kosina, J., Holub, L., et al.        | Radical prostatectomy in high-grade prostate cancer, salvage and adjuvant radiotherapy.                                                                                                       | 2011 | Urologia Internationalis           | Embase | Prostate Cancer |
| Buckley JC.                                      | Complications after radical prostatectomy: anastomotic stricture and rectourethral fistula.                                                                                                   | 2011 | Curr. Opin. Urol.                  | PubMed | Prostate Cancer |
| Bukkapatnam, R., & Pow-Sang, J. M.               | Radical prostatectomy in the management of clinically localized prostate cancer.                                                                                                              | 2001 | Cancer Control                     | Embase | Prostate Cancer |
| Chalasan, V., Martinez, C. H., Lim, D., et       | Salvage HIFU for recurrent prostate cancer after radiotherapy.                                                                                                                                | 2009 | Prostate Cancer Prostatic Dis.     | Embase | Prostate Cancer |
| Chancellor, M. B., Watanabe, T., Rivas, D.       | Gracilis urethral myoplasty: Preliminary experience using an autologous urinary sphincter for post-prostatectomy incontinence.                                                                | 1997 | J. Urol.                           | Embase | Prostate Cancer |
| Changjun, Y.                                     | Laparoscopic radical prostatectomy (reported of 110 cases).                                                                                                                                   | 2009 | J. Endourol.                       | Embase | Prostate Cancer |
| Chen, Y.-C., Chuang, C.-K., Hsieh, M.-L.         | High-Dose-Rate Brachytherapy Plus External Beam Radiotherapy for T1 to T3 Prostate Cancer: An Experience from a Single Institution.                                                           | 2007 | Urology                            | Embase | Prostate Cancer |
| Colombo R, Naspro R, Salonia A, et al.           | Radical prostatectomy after previous prostate surgery: clinical and functional outcomes.                                                                                                      | 2006 | J. Urol.                           | PubMed | Prostate Cancer |
| Comploj, E., Palermo, S., Trenti, E., et al      | Radical perineal prostatectomy: An outdated procedure?                                                                                                                                        | 2011 | Int. J. Surg.                      | Embase | Prostate Cancer |
| Crook, J., Lukka, H., Klotz, L., et al.          | Systematic overview of the evidence for brachytherapy in clinically localized prostate cancer.                                                                                                | 2001 | Can. Med. Assoc. J.                | Embase | Prostate Cancer |
| D'Urso, L., Migliari, R., Collura, D., et al.    | Intensity-modulated TR-HIFU (IMTR-HIFU) with sonablate 500(registered trademark) for the treatment of localized prostate cancer.                                                              | 2009 | Eur. Urol.                         | Embase | Prostate Cancer |
| Dallas, N. L., Malone, P. R., Jones, A., et      | Size doesn't matter; at least not with real time prostate brachytherapy.                                                                                                                      | 2011 | BJU Int.                           | Embase | Prostate Cancer |
| Damber, J.-E., & Aus, G.                         | Prostate cancer.                                                                                                                                                                              | 2008 | Lancet                             | Embase | Prostate Cancer |
| De Reijke, T. M., & Laguna, M. P.                | Long-term complications of brachytherapy in local prostate cancer.                                                                                                                            | 2003 | BJU Int.                           | Embase | Prostate Cancer |
| Dearnaley, D. P., Sydes, M. R., Graham, M.       | Escalated-dose versus standard-dose conformal radiotherapy in prostate cancer: first results from the MRC PR07 randomised controlled trial.                                                   | 2007 | Lancet Oncology                    | Embase | Prostate Cancer |
| Dearnaley, D. P., Sydes, M. R., Langleitner      | The early toxicity of escalated versus standard dose conformal radiotherapy with neo-adjuvant androgen suppression in prostate cancer: results from the MRC PR07 randomised controlled trial. | 2007 | Radiother. Oncol.                  | Embase | Prostate Cancer |
| Doust J, Miller E, Duchesne G, et al.            | A systematic review of brachytherapy. Is it an effective and safe treatment for localised prostate cancer?                                                                                    | 2004 | Aust Fam Physician                 | PubMed | Prostate Cancer |
| Erichman M, Handelsman H, Hotta SS.              | Cryosurgery for recurrent prostate cancer following radiation therapy.                                                                                                                        | 1999 | Health Technol. Assess.            | PubMed | Prostate Cancer |
| Finley, D. S., Pouliot, F., Miller, D. C., et al | Primary and Salvage Cryotherapy for Prostate Cancer.                                                                                                                                          | 2010 | Urol. Clin. North Am.              | Embase | Prostate Cancer |
| Fontanella, U., Castiglioni, M., Fonte, A.,      | Continence problems after radical prostatectomy: The medical treatment.                                                                                                                       | 2001 | Arch. Ital. Urol. Androl.          | Embase | Prostate Cancer |
| Gerber, D. E., & Chan, T. A.                     | Recent advances in radiation therapy.                                                                                                                                                         | 2008 | Am. Fam. Phys.                     | Embase | Prostate Cancer |
| Gillett, M. D., Gettman, M. T., Zincke, H.,      | Tissue ablation technologies for localized prostate cancer.                                                                                                                                   | 2004 | Mayo Clinic Proc.                  | Embase | Prostate Cancer |
| Goenka, A., Magsanoc, J. M., Pei, X., et al      | Improved toxicity profile following high-dose postprostatectomy salvage radiation therapy with intensity-modulated radiotherapy.                                                              | 2011 | Eur. Urol.                         | Embase | Prostate Cancer |
| Gomez-Iturriaga Pina, A., Crook, J., Borg        | Median 5 Year Follow-up of 125Iodine Brachytherapy as Monotherapy in Men Aged (less-than or equal to) 55 years.                                                                               | 2010 | Urology                            | Embase | Prostate Cancer |
| Graziotti P, Giusti G, Seveso M, et al.          | Retropubic nerve and seminal sparing radical prostatectomy for recurrent bladder neck-prostatic urethra stricture.                                                                            | 2005 | Arch. Ital. Urol. Androl.          | PubMed | Prostate Cancer |
| Grills, I. S., Martinez, A. A., Hollander, M.    | High dose rate brachytherapy as prostate cancer monotherapy reduces toxicity compared to low dose rate brachytherapy.                                                                         | 2004 | J. Urol.                           | Embase | Prostate Cancer |

|                                              |                                                                                                                  |      |                                |        |                 |
|----------------------------------------------|------------------------------------------------------------------------------------------------------------------|------|--------------------------------|--------|-----------------|
| Harris, M. J., & Iselin, C. E.               | Radical perineal prostatectomy: Cost efficient, outcome effective, minimally invasive prostate cancer manage     | 2003 | Eur. Urol.                     | Embase | Prostate Cancer |
| Hu JC, Gold KF, Pashos CL, et al.            | Temporal trends in radical prostatectomy complications from 1991 to 1998.                                        | 2003 | J. Urol.                       | PubMed | Prostate Cancer |
| Huang, W. C., Lee, C. L., & Eastham, J. A.   | Locally ablative therapies for primary radiation failures: A review and critical assessment of the efficacy.     | 2007 | Curr. Urol. Rep.               | Embase | Prostate Cancer |
| Illing, R., & Emberton, M.                   | Sonablate(registered trademark)-500: Transrectal high-intensity focused ultrasound for the treatment of prost    | 2006 | Expert Rev. Med. Devices       | Embase | Prostate Cancer |
| Inoue, Y., Goto, K., Hayashi, T., et al.     | Transrectal high-intensity focused ultrasound for treatment of localized prostate cancer.                        | 2011 | Int. J. Urol.                  | Embase | Prostate Cancer |
| Izard, M. A., Haddad, R. L., Fogarty, G. B.  | Six year experience of external beam radiotherapy, brachytherapy boost with a 1Ci 192Ir source, and neoadj       | 2006 | Radiation Oncology Biology     | Embase | Prostate Cancer |
| Jamal, K., Patel, P., & Sooriakumaran, P.    | Minimally invasive surgical modalities in the management of localized prostate cancer.                           | 2008 | Expert Rev. Anticancer Ther    | Embase | Prostate Cancer |
| Jani AB, Hellman S.                          | Early prostate cancer: hedonic prices model of provider-patient interactions and decisions.                      | 2008 | Int. J. Radiat. Oncol. Biol. P | PubMed | Prostate Cancer |
| Jayram, G., Decastro, G. J., Large, M. C.    | Robotic radical prostatectomy in patients with high-risk disease: A review of short-term outcomes from a high    | 2011 | J. Endourol.                   | Embase | Prostate Cancer |
| Kanikowski, M., Skowronek, J., Kubasze       | Permanent implants in treatment of prostate cancer.                                                              | 2008 | Rep. Pract. Oncol. Radiothe    | Embase | Prostate Cancer |
| Kao TC, Cruess DF, Garner D, et al.          | Multicenter patient self-reporting questionnaire on impotence, incontinence and stricture after radical prostate | 2000 | J. Urol.                       | PubMed | Prostate Cancer |
| Khaksar, S. J., Laing, R. W., Henderson,     | Biochemical (prostate-specific antigen) relapse-free survival and toxicity after 125I low-dose-rate prostate bra | 2006 | BJU Int.                       | Embase | Prostate Cancer |
| King, C.                                     | Stereotactic body radiotherapy for prostate cancer: Current results of a phase II trial.                         | 2011 | Front Radiat. Ther. Oncol.     | Embase | Prostate Cancer |
| Kulkarni, J. N., Singh, D. P., Bansal, S., e | Retropubic radical prostatectomy: Clinicopathological observations and outcome analysis of 428 consecutive       | 2011 | Indian J. Urol.                | Embase | Prostate Cancer |
| Kundu, S. D., Roehl, K. A., Eggener, S. E    | Potency, continence and complications in 3,477 consecutive radical retropubic prostatectomies.                   | 2004 | J. Urol.                       | Embase | Prostate Cancer |
| Kuyumcuoglu, U., Eryildirim, B., Tarhan,     | Antegrade endourethroplasty with free skin graft for recurrent vesicourethral anastomotic strictures after radi  | 2010 | J. Endourol.                   | Embase | Prostate cancer |
| Leonardo, C., Simone, G., Papalia, R., et    | Salvage radical prostatectomy for recurrent prostate cancer after radiation therapy.                             | 2009 | Int. J. Urol.                  | Embase | Prostate Cancer |
| Lian, H., Guo, H., Gan, W., et al.           | Cryosurgery as primary treatment for localized prostate cancer.                                                  | 2011 | International Urology and N    | Embase | Prostate Cancer |
| Litwin, M. S.                                | Improving the utility of quality-of-life data from men with prostate cancer.                                     | 2009 | J. Clin. Oncol.                | Embase | Prostate Cancer |
| Lowther, D. N., Cowles, R. S., & Dixit, N.   | Use of prostate HDR as salvage for local failure after prior prostate cancer therapy.                            | 2010 | Brachytherapy                  | Embase | Prostate Cancer |
| Manea, C. N., Crisan, N., Giurgiu, C. R.,    | High-intensity focused ultrasound ablation for prostate cancer: Initial experience.                              | 2010 | Eur. Urol.                     | Embase | Prostate Cancer |
| Mangar, S., Logue, J., & Wylie, J            | Prostate brachytherapy - The use of permanent prostatic seed implants for localised prostate cancer.             | 2003 | CME Cancer Med.                | Embase | Prostate Cancer |
| Master, V. A., Shinohara, K., & Carroll, P.  | Ferromagnetic thermal ablation of locally recurrent prostate cancer: Prostate specific antigen results and imm   | 2004 | J. Urol.                       | Embase | Prostate Cancer |
| Mazur, D. J., Hickam, D. H., & Mazur, M.     | How patients' preferences for risk information influence treatment choice in a case of high risk and high thera  | 1999 | Med Decis Mak                  | Embase | Prostate Cancer |
| Merrick, G. S., Butler, W. M., Wallner, K.   | Permanent prostate brachytherapy-induced morbidity in patients with grade II and III obesity.                    | 2002 | Urology                        | Embase | Prostate Cancer |
| Merrick, G. S., Wallner, K. E., & Butler, W  | Minimizing prostate brachytherapy-related morbidity.                                                             | 2003 | Urology                        | Embase | Prostate Cancer |
| Miller, S. L., Bucci, J., Chin, Y., et al.   | HDR brachytherapy with external beam radiotherapy and androgen deprivation therapy for prostate cancer: I        | 2011 | Brachytherapy                  | Embase | Prostate Cancer |
| Montorsi, F., Salonia, A., Suardi, N., et al | Improving the preservation of the urethral sphincter and neurovascular bundles during open radical retropubi     | 2005 | Eur. Urol.                     | Embase | Prostate Cancer |
| Mouraviev, V., & Polascik, T. J.             | Update on cryotherapy for prostate cancer in 2006.                                                               | 2006 | Curr. Opin. Urol.              | Embase | Prostate Cancer |
| Namiki S, Takegami M, Kakehi Y, et al.       | Analysis linking UCLA PCI with Expanded Prostate Cancer Index Composite: an evaluation of health related         | 2007 | J. Urol.                       | PubMed | Prostate Cancer |
| Nguyen, C. T., & Jones, J. S.                | Focal therapy in the management of localized prostate cancer.                                                    | 2011 | BJU Int.                       | Embase | Prostate Cancer |
| Nisar Syed, A. M., Puthawala, A., Sharma     | High-dose-rate brachytherapy in the treatment of carcinoma of the prostate.                                      | 2001 | Cancer Control                 | Embase | Prostate Cancer |
| Noda, Y., Sato, M., Shirai, S., et al.       | Efficacy and safety of high-dose-rate brachytherapy of single implant with two fractions combined with extern    | 2011 | Cancers                        | Embase | Prostate Cancer |
| Nohara, T., Mizokami, A., Kumano, T., et     | Clinical results of iridium-192 high dose rate brachytherapy with external beam radiotherapy.                    | 2010 | Jpn. J. Clin. Oncol.           | Embase | Prostate Cancer |
| O'Connor, K. M., & Fitzpatrick, J. M.        | Side-effects of treatments for locally advanced prostate cancer.                                                 | 2006 | BJU Int.                       | Embase | Prostate Cancer |
| Olweny, E., Yamasaki, I., Cooperberg, M      | Long-term outcomes following iodine-125 prostate brachytherapy for localized prostate cancer in a unique Ve      | 2010 | J. Urol.                       | Embase | Prostate Cancer |
| Payne, H.                                    | Management of locally advanced prostate cancer.                                                                  | 2009 | Asian J Androl.                | Embase | Prostate Cancer |
| Perez, C. A., Michalski, J., & Mansur, D.    | Clinical assessment of outcome of prostate cancer (TCP, NTCP).                                                   | 2005 | Rays. Int. J. Radiol. Sci.     | Embase | Prostate Cancer |
| Polascik, T. J., Mayes, J. M., & Mouravie    | From whole-gland to targeted cryoablation for the treatment of unilateral or focal prostate cancer.              | 2008 | Oncology                       | Embase | Prostate Cancer |
| Rebillard, X., Soulie, M., Chartier-Kastler  | High-intensity focused ultrasound in prostate cancer: a systematic literature review of the French Association   | 2008 | BJU Int.                       | Embase | Prostate Cancer |
| Reddy, S. M., Ruby, J., Wallace, M., et al   | Patient self-assessment of complications and quality of life after conformal neutron and photon irradiation for  | 1997 | Radiat. Oncol. Invest.         | Embase | Prostate Cancer |
| Rehman J, Ragab MM, Venkatesh R, et al       | Laparoscopic radical prostatectomy: Washington University initial experience and prospective evaluation of o     | 2004 | J. Endourol.                   | PubMed | Prostate Cancer |
| Reiss, P., Pfalzgraf, D., Kluth, L., et al.  | Perineal-reanastomosis for the treatment of recurrent anastomotic strictures: Outcome and patient satisfactio    | 2011 | J. Urol.                       | Embase | Prostate Cancer |
| Ripert T, Azémar MD, Ménard J, et al.        | Transrectal high-intensity focused ultrasound (HIFU) treatment of localized prostate cancer: review of technic   | 2010 | Prostate Cancer Prostatic D    | PubMed | Prostate Cancer |
| Ritch, C. R., & Katz, A. E.                  | Prostate cryotherapy: Current status.                                                                            | 2009 | Curr. Opin. Urol.              | Embase | Prostate Cancer |

|                                                         |                                                                                                                                                                                 |      |                                    |        |                   |
|---------------------------------------------------------|---------------------------------------------------------------------------------------------------------------------------------------------------------------------------------|------|------------------------------------|--------|-------------------|
| Rocco F, Carmignani L, Acquati P, et al.                | Restoration of posterior aspect of rhabdosphincter shortens continence time after radical retropubic prostatectomy.                                                             | 2006 | J. Urol.                           | PubMed | Prostate Cancer   |
| Rogers, C. L., Alder, S. C., Rogers, R. L., et al.      | High dose brachytherapy as monotherapy for intermediate risk prostate cancer.                                                                                                   | 2012 | J. Urol.                           | Embase | Prostate Cancer   |
| Sajid, S., Mohile, S. G., Szmulewitz, R., et al.        | Individualized decision-making for older men with prostate cancer: Balancing cancer control with treatment of comorbidities.                                                    | 2011 | Semin. Oncol.                      | Embase | Prostate Cancer   |
| Scardino, P. T.                                         | Continuing refinements in radical prostatectomy: More evidence that technique matters.                                                                                          | 2005 | J. Urol.                           | Embase | Prostate Cancer   |
| Seabra D, Faria E, Dauster B, et al.                    | Critical analysis of salvage radical prostatectomy in the management of radioresistant prostate cancer.                                                                         | 2009 | Int. Braz. J. Urol.                | PubMed | Prostate Cancer   |
| Seo PH, D'Amico AV, Clark JA, et al.                    | Assessing a prostate cancer brachytherapy technique using early patient-reported symptoms: a potential early endpoint.                                                          | 2004 | Clin. Prostate Cancer              | PubMed | Prostate Cancer   |
| Shelley M, Wilt TJ, Coles B, et al.                     | Cryotherapy for localised prostate cancer.                                                                                                                                      | 2007 | Cochrane Database Syst. Rev.       | PubMed | Prostate Cancer   |
| Shinohara, K.                                           | Cryotherapy.                                                                                                                                                                    | 2007 | J. Clin. Oncol.                    | Embase | Prostate Cancer   |
| Shinohara, K.                                           | Prostate cancer: Cryotherapy.                                                                                                                                                   | 2003 | Urol. Clin. North Am.              | Embase | Prostate Cancer   |
| Stock, R. G., & Stone, N. N.                            | Preliminary toxicity and prostate-specific antigen response of a Phase I/II trial of neoadjuvant hormonal therapy followed by high-dose-rate brachytherapy for prostate cancer. | 2002 | Brachytherapy                      | Embase | Prostate Cancer   |
| Suardi N, Scattoni V, Briganti A, et al.                | Nerve-sparing radical retropubic prostatectomy in patients previously submitted to holmium laser enucleation of the prostate.                                                   | 2008 | Eur. Urol.                         | PubMed | Prostate Cancer   |
| Talcott JA, Manola J, Clark JA, et al.                  | Time course and predictors of symptoms after primary prostate cancer therapy.                                                                                                   | 2003 | J. Clin. Oncol.                    | PubMed | Prostate Cancer   |
| Thompson, I. M., Middleton, R. G., Opter, J. M., et al. | Have complication rates decreased after treatment for localized prostate cancer?                                                                                                | 1999 | J. Urol.                           | Embase | Prostate Cancer   |
| Tward, J. D., & Shrieve, D. C.                          | Brachytherapy monotherapy for older men with prostate cancer.                                                                                                                   | 2007 | Aging Health                       | Embase | Prostate Cancer   |
| Uchida, T., Baba, S., Irie, A., et al.                  | Transrectal high-intensity focused ultrasound in the treatment of localized prostate cancer: A multicenter study.                                                               | 2005 | Act Urol. Jpn.                     | Embase | Prostate Cancer   |
| Uchida, T., Nakano, M., Shoji, S., et al.               | Ten-year biochemical disease-free survival after high intensity focused ultrasound (HIFU) for localized prostate cancer.                                                        | 2010 | J. Urol.                           | Embase | Prostate Cancer   |
| Uchida, T., Ohkusa, H., Yamashita, H., et al.           | Five years experience of transrectal high-intensity focused ultrasound using the Sonablate device in the treatment of localized prostate cancer.                                | 2006 | Int. J. Urol.                      | Embase | Prostate Cancer   |
| Valero, J., Cambeiro, M., Galan, C., et al.             | Phase II Trial of Radiation Dose Escalation With Conformal External Beam Radiotherapy and High-Dose-Rate Brachytherapy for Prostate Cancer.                                     | 2010 | Radiation Oncology Biology Physics | Embase | Prostate Cancer   |
| Van Niekerk, W., & Van Rensburg, A. J.                  | Initial side-effect profile of dynamic feedback real-time prostate brachytherapy of the first 1450 patients in Gauteng, South Africa.                                           | 2011 | Brachytherapy                      | Embase | Prostate Cancer   |
| Vargas, C., Ghilezan, M., Hollander, M., et al.         | A new model using number of needles and androgen deprivation to predict chronic urinary toxicity for high-dose-rate brachytherapy.                                              | 2005 | J. Urol.                           | Embase | Prostate Cancer   |
| Végh A.                                                 | Two methods in the treatment of prostate cancer T1-T2.                                                                                                                          | 1997 | Acta Chir Hung                     | PubMed | Prostate Cancer   |
| Vicini FA, Kestin LL, Martinez AA.                      | Use of conformal high-dose rate brachytherapy for management of patients with prostate cancer: optimizing the treatment.                                                        | 2000 | Tech. Urol.                        | PubMed | Prostate Cancer   |
| Vikram, B., Coleman, C. N., & Deye, J. A.               | Current status and future potential of advanced technologies in radiation oncology: Part 2. State of the science.                                                               | 2009 | Oncology                           | Embase | Prostate Cancer   |
| Wallner, K., Henry, L., Wasserman, S., et al.           | Low risk of urinary incontinence following prostate brachytherapy in patients with a prior transurethral prostatectomy.                                                         | 1997 | Radiation Oncology Biology Physics | Embase | Prostate Cancer   |
| Woolf, S. H.                                            | The benefits and harms of screening for prostate cancer.                                                                                                                        | 1997 | Forum Trends Exp. Clin. Med.       | Embase | Prostate Cancer   |
| Zeitlin, S. I., Sherman, J., Raboy, A., et al.          | High dose combination radiotherapy for the treatment of localized prostate cancer.                                                                                              | 1998 | J. Urol.                           | Embase | Prostate Cancer   |
| Zelevsky, M. J., Chan, H., Hunt, M., et al.             | Long-Term Outcome of High Dose Intensity Modulated Radiation Therapy for Patients With Clinically Localized Prostate Cancer.                                                    | 2006 | J. Urol.                           | Embase | Prostate Cancer   |
| Zelevsky, M. J., Cowen, D., Fuks, Z., et al.            | Long term tolerance of high dose three-dimensional conformal radiotherapy in patients with localized prostate cancer.                                                           | 1999 | Cancer                             | Embase | Prostate Cancer   |
| Zelevsky, M. J., Wallner, K. E., Ling, C. C.            | Comparison of the 5-year outcome and morbidity of three-dimensional conformal radiotherapy versus transperineal prostatectomy.                                                  | 1999 | J. Clin. Oncol.                    | Embase | Prostate Cancer   |
| Zelevsky, M. J., Wallner, K. E., Ling, C. C.            | Comparison of the early outcome and morbidity of three-dimensional conformal radiotherapy versus transperineal prostatectomy.                                                   | 1999 | J. Clin. Oncol.                    | Embase | Prostate Cancer   |
| Zietman, A. L., & Shipley, W. U.                        | Proton beam therapy in localized prostate cancer.                                                                                                                               | 2000 | Prostate J                         | Embase | Prostate Cancer   |
| Arndt, C., Rodeberg, D., Breifeld, P. P., et al.        | Does bladder preservation (as a surgical principle) lead to retaining bladder function in bladder/prostate rhabdomyosarcoma?                                                    | 2004 | J. Urol.                           | Embase | Rhabdo            |
| Seitz, G., Dantonello, T. M., Int-Veen, C., et al.      | Treatment efficiency, outcome and surgical treatment problems in patients suffering from localized embryonal rhabdomyosarcoma.                                                  | 2011 | Pediatr. Blood Cancer              | Embase | Rhabdo            |
| Hsieh, M. H., & Meng, M. V.                             | Decision Analysis and Markov Modeling in Urology.                                                                                                                               | 2007 | J. Urol.                           | Embase | Statistics        |
| Heyns, C. F., & Bornman, M. S.                          | Men's Health in Africa. Part 1: Reproductive urogenital diseases and human immunodeficiency virus infection.                                                                    | 2008 | J. Men's Health                    | Embase | STD               |
| Rosen, T., Vandergriff, T., & Harting, M.               | Antibiotic Use in Sexually Transmissible Diseases.                                                                                                                              | 2009 | Dermatol. Clin.                    | Embase | STD               |
| Hautmann RE, Stein JP.                                  | Neobladder with prostatic capsule and seminal-sparing cystectomy for bladder cancer: a step in the wrong direction?                                                             | 2005 | Urol. Clin. North Am.              | PubMed | TCC               |
| Hautmann RE.                                            | Which patients with transitional cell carcinoma of the bladder or prostatic urethra are candidates for an orthotopic bladder substitution?                                      | 2000 | Curr. Urol. Rep.                   | PubMed | TCC               |
| Henningssohn L, Steven K, Kallestrup EB.                | Distressful symptoms and well-being after radical cystectomy and orthotopic bladder substitution compared with transurethral prostatectomy.                                     | 2002 | J. Urol.                           | PubMed | TCC               |
| Horenblas S, Meinhardt W, Ijzerman W, et al.            | Sexuality preserving cystectomy and neobladder: initial results.                                                                                                                | 2001 | J. Urol.                           | PubMed | TCC               |
| Lawrentschuk, N., Colombo, R., Hakenberg, H. W., et al. | Prevention and Management of Complications Following Radical Cystectomy for Bladder Cancer.                                                                                     | 2010 | Eur. Urol.                         | Embase | TCC               |
| Vallancien G, Abou El Fetouh H, et al.                  | Cystectomy with prostate sparing for bladder cancer in 100 patients: 10-year experience.                                                                                        | 2002 | J. Urol.                           | PubMed | TCC               |
| Wunderlich, H., Wolf, M., Reichelt, O., et al.          | Radical cystectomy with ultrasound-guided partial prostatectomy for bladder cancer: A complication-preventing procedure.                                                        | 2006 | Urology                            | Embase | TCC               |
| Herr, H. W., & Mcaninch, J. W.                          | Urethral injuries in the Civil War.                                                                                                                                             | 2005 | J. Urol.                           | Embase | Urethral Injuries |
| Kommu, S. S., Illahi, I., & Mumtaz, F.                  | Patterns of urethral injury and immediate management.                                                                                                                           | 2007 | Curr. Opin. Urol.                  | Embase | Urethral Injuries |

|                                              |                                                                                                                 |      |                           |              |                   |
|----------------------------------------------|-----------------------------------------------------------------------------------------------------------------|------|---------------------------|--------------|-------------------|
| Agarwal, S                                   | Urethral valves                                                                                                 | 1999 | BJU Int.                  | Embase       | Urethral Valves   |
| Caione P, Nappo SG.                          | Posterior urethral valves: long-term outcome.                                                                   | 2011 | Pediatr. Surg. Int.       | PubMed       | Urethral Valves   |
| Abdul-Rahman A, Ismail S, Hamid R, Sha       | A 20-year follow-up of the mesh wallstent in the treatment of detrusor external sphincter dyssynergia in patie  | 2010 | BJU Int.                  | PubMed       | Wallstent         |
| De Vocht TF, van Venrooij GE, Boon TA.       | Self-expanding stent insertion for urethral strictures: a 10-year follow-up.                                    | 2003 | BJU Int.                  | PubMed       | Wallstent         |
| Hamid R, Arya M, Patel HR, et al.            | The mesh wallstent in the treatment of detrusor external sphincter dyssynergia in men with spinal cord injury   | 2003 | BJU Int.                  | PubMed       | Wallstent         |
| Hussain, M., Greenwell, T. J., Shah, J., e   | Long-term results of a self-expanding wallstent in the treatment of urethral stricture.                         | 2004 | BJU Int.                  | Embase       | Wallstent         |
| Jordan, G., & Van Der Burght, M.             | MemokathTM044 - A removable stent for treatment of recurrent bulbar urethral strictures. Results of a US mu     | 2011 | Eur. Urol.                | Embase       | Wallstent         |
| Jordan, G., & Van Der Burght, M.             | Memokath(trademark)044-A removable stent for treatment of recurrent bulbar urethral strictures. Results of th   | 2011 | J. Urol.                  | Embase       | Wallstent         |
| Morgia G, Saita A, Morana F, et al.          | Endoprosthesis implantation in the treatment of recurrent urethral stricture: a multicenter study.              | 1999 | J. Endourol.              | PubMed       | Wallstent         |
| Palminteri, E.                               | Stents and Urethral Strictures: A Lesson Learned?                                                               | 2008 | Eur. Urol.                | Embase       | Wallstent         |
|                                              |                                                                                                                 |      |                           |              |                   |
|                                              |                                                                                                                 |      |                           |              |                   |
| <b>Meets Exclusion Criteria</b>              |                                                                                                                 |      |                           |              |                   |
| Coban, Y. K.                                 | Subglanular stricture: Rare penile anomaly resulting from circumcision.                                         | 2003 | Ann. Plast. Surg.         | Embase       | Case report       |
| Jones JS.                                    | Management of urethral straddle injury after radical prostatectomy.                                             | 2002 | Urology                   | PubMed       | Case report       |
| Kardar AH, Aslam M, Lindstedt E.             | An unusual complication of penile prosthesis following urethroplasty.                                           | 2002 | Scand. J. Urol. Nephrol.  | PubMed       | Case report       |
| Parker WR, Wheat J, Montgomery JS, et        | Urethral diverticulum after endoscopic urethrotomy: case report.                                                | 2007 | Urology                   | PubMed       | Case report       |
| Prabhu, N. K., Moorthy, S., Sreekumar, K     | Post-traumatic high-flow priapism treated by transarterial embolisation - A case report.                        | 2002 | Indian J. Radiol. Imaging | Embase       | Case report       |
| Santaneli F, Paolini G.                      | Glans, urethra, and corporeal body reconstruction by free osteocutaneous forearm flap transfer.                 | 2003 | Ann. Plast. Surg.         | PubMed       | Case report       |
| Singh, I., Mittal, G., & Chakraborty, S.     | Bilateral corporal fracture with urethral rupture following intercourse-Case report with review of literature.  | 2008 | J. Clin. Diagn. Res.      | Embase       | Case report       |
| Tanello M, Bettini E, Griggi S, et al.       | A rare case of penile fracture with complete urethral rupture during sexual intercourse.                        | 2005 | Arch. Ital. Urol. Androl. | PubMed       | Case report       |
| Tsujimoto, Y., Hatano, K., Satoh, M., et al  | Urethral disruption treated by echo guided endoscopic management: A case report.                                | 2007 | Jpn. J. Urol.             | Embase       | Case report       |
| Aggarwal SK, Sinha SK, Kumar A, et al.       | Traumatic strictures of the posterior urethra in boys with special reference to recurrent strictures.           | 2011 | J. Pediatr. Urol.         | PubMed       | Children          |
| Amsalem H, Fitzgerald B, Keating S, et a     | Congenital megalourethra: prenatal diagnosis and postnatal/autopsy findings in 10 cases.                        | 2011 | Ultrasound Obstet. Gyneco | PubMed       | Children          |
| Baird AD, Gearhart JP, Mathews RI.           | Applications of the modified Cantwell-Ransley epispadias repair in the exstrophy-epispadias complex.            | 2005 | J. Pediatr. Urol.         | Other Search | Children          |
| Benjamin F, Castagnetti M, Rigamonti W       | Surgical management of penile amputation in children.                                                           | 2008 | J. Pediatr. Surg.         | PubMed       | Children          |
| Bhardwaj, N., Yaddanapudi, S., Ghai, B.      | Neostigmine does not prolong the duration of analgesia produced by caudal bupivacaine in children undergo       | 2007 | J. Postgrad. Med.         | Embase       | Children          |
| Das, K., Charles, A. R., Alladi, A., Rat, S. | Traumatic posterior urethral disruptions in boys: Experience with the perineal/perineal-transpubic approach in  | 2004 | Pediatr. Surg. Int.       | Embase       | Children          |
| Erol D, Emir L, Germiyanoglu C.              | Outcome of pull-in procedure in children with severe post-disruption posterior urethral strictures.             | 2001 | Pediatr. Surg. Int.       | PubMed       | Children          |
| Freitas Filho, L. G., Carnevale, J., Melo F  | Posterior urethral injuries and the Mitrofanoff principle in children.                                          | 2003 | BJU Int.                  | Embase       | Children          |
| Hafez AT, El-Assmy A, Sarhan O, et al.       | Perineal anastomotic urethroplasty for managing post-traumatic urethral strictures in children: the long-term c | 2005 | BJU Int.                  | PubMed       | Children          |
| Khan, M., Qadri, S. J. F., Rather, A. A., et | 11 year old boy with megalourethra.                                                                             | 2011 | JK Pract.                 | Embase       | Children          |
| Mesrobian, H.-G. O., Chassaignac, J. M.      | Paediatric penile trauma.                                                                                       | 2002 | BJU Int.                  | Embase       | Children          |
| Nerli RB, Koura AC, Ravish IR, et al.        | Posterior urethral injury in male children: long-term follow up.                                                | 2008 | J. Pediatr. Urol.         | PubMed       | Children          |
| Onen A, Oztürk H, Kaya M, et al.             | Long-term outcome of posterior urethral rupture in boys: a comparison of different surgical modalities.         | 2005 | Urology                   | PubMed       | Children          |
| Otgün I, Karnak I, Senocak ME, et al.        | Late urodynamic findings after treating traumatic rupture of the posterior urethra in boys.                     | 2006 | BJU Int.                  | PubMed       | Children          |
| Subasi, M., Arslan, H., Necmioglu, S., et    | Long-term outcomes of conservatively treated paediatric pelvic fractures.                                       | 2004 | Injury                    | Embase       | Children          |
| Sunay, M., Karabulut, A., Dadal, M., et al   | Single-institution outcomes of open reconstruction techniques for management of pediatric and adolescent p      | 2010 | Urology                   | Embase       | Children          |
| Upadhyaya                                    | Management of traumatic urethral disruption in children: Oman experience 1988-2000                              | 2002 | J. Pediatr. Surg.         | Other Search | Children          |
| Warne, S. A., Hiorns, M. P., Curry, J., et a | Understanding cloacal anomalies.                                                                                | 2011 | Arch. Dis. Child          | Embase       | Children          |
| Zhou FJ, Xiong YH, Zhang XP, et al.          | Transperineal end-to-end anastomotic urethroplasty for traumatic posterior urethral disruption and strictures i | 2002 | Asian J. Surg             | PubMed       | Children          |
| Ayyildiz, A., Akgul, T., & Nuhoglu, B.       | Hamid Mazdak, Iraj Meshki and Fatemeh Ghassami. Effect of Mitomycin C on Anterior Urethral Stricture Rec        | 2007 | Eur. Urol.                | Embase       | Editorial Comment |
| Barbagli, G.                                 | Editorial Comment.                                                                                              | 2006 | J. Urol.                  | Embase       | Editorial Comment |
| Barbagli, G.                                 | Editorial Comment.                                                                                              | 2007 | J. Urol.                  | Embase       | Editorial Comment |
| Barbagli, G., & Lazzeri, M.                  | Editorial Comment on: Safety and Tolerability of Adjuvant Topical Tacrolimus Treatment in Boys with Lichen S    | 2008 | Eur. Urol.                | Embase       | Editorial Comment |
| Brandes, S. B.                               | The treatment of posterior urethral disruption associated with pelvic fractures: Comparative experience of ear  | 2005 | Int. Braz. J. Urol.       | Embase       | Editorial Comment |
| Carr, M. C., Nelson, C. P., Bloom, D. A., e  | Patient-reported sexual function after oral mucosa graft urethroplasty for hypospadias: Commentary.             | 2005 | Urology                   | Embase       | Editorial Comment |

|                                               |                                                                                                                      |      |                                |              |                   |
|-----------------------------------------------|----------------------------------------------------------------------------------------------------------------------|------|--------------------------------|--------------|-------------------|
| de León JP.                                   | Erectile function, sexual drive, and ejaculatory function alter reconstructive surgery for anterior urethral strictu | 2007 | BJU Int.                       | PubMed       | Editorial Comment |
| Editor's comment.                             | Editor's comment.                                                                                                    | 1999 | BJU Int.                       | Embase       | Editorial Comment |
| Editor's comment.                             | Editor's comment.                                                                                                    | 1999 | BJU Int.                       | Embase       | Editorial Comment |
| Elliott SP.                                   | The evolution of urethral reconstruction.                                                                            | 2011 | J. Urol.                       | PubMed       | Editorial Comment |
| Fu, Q.                                        | Reply.                                                                                                               | 2009 | Urology                        | Embase       | Editorial Comment |
| Gonzalez, C. M.                               | Editorial Comment.                                                                                                   | 2007 | J. Urol.                       | Embase       | Editorial Comment |
| Gozzi, C., Tritschler, S., Bastian, P. J., et | Urethroplasty for Stricture Disease-What Is Success Beyond the Voiding Function?                                     | 2008 | Eur. Urol.                     | Embase       | Editorial Comment |
| Haferkamp, A., & Djakovic, N.                 | Editorial Comment on: Urethral Reconstruction Using the Radial Forearm Free Flap: Experience in Oncologic            | 2007 | Eur. Urol.                     | Embase       | Editorial Comment |
| Jordan, G. H.                                 | Editorial comment.                                                                                                   | 2011 | Urology                        | Embase       | Editorial Comment |
| Jordan, G. H., & McAninch, J. W.              | The incidence and causes of erectile dysfunction after pelvic fractures associated with posterior urethral disru     | 2003 | J. Urol.                       | Embase       | Editorial Comment |
| Lazzeri, M.                                   | Editorial comment.                                                                                                   | 2005 | Int. Braz. J. Urol.            | Embase       | Editorial Comment |
| Lazzeri, M.                                   | Editorial comment.                                                                                                   | 2006 | Int. Braz. J. Urol.            | Embase       | Editorial Comment |
| Manchip, S., & Morrison, C.                   | Editorial Comment                                                                                                    | 1999 | Br. Med. J.                    | Embase       | Editorial Comment |
| Morey AF, McAninch JW.                        | Reconstruction of traumatic posterior urethral strictures.                                                           | 1997 | Tech. Urol.                    | PubMed       | Editorial Comment |
| Morey, A. F.                                  | Trauma, and genital and urethral reconstruction.                                                                     | 2005 | J. Urol.                       | Embase       | Editorial Comment |
| Morey, A. F.                                  | Long-term results of early endoscopic realignment of complete posterior urethral disruption: Editorial comm          | 2011 | J. Urol.                       | Embase       | Editorial Comment |
| Morey, A. F.                                  | Total phallic reconstruction after penile amputation for carcinoma: Editorial comment.                               | 2011 | J. Urol.                       | Embase       | Editorial Comment |
| Morey, A. F.                                  | Transpubic urethroplasty revisited: Total, superior, or inferior pubectomy?                                          | 2010 | J. Urol.                       | Embase       | Editorial Comment |
| Mundy, A. R., Jackson, M. J., Andrich, D.     | Reply from Authors re: Guido Barbagli, Massimo Lazzeri. Patient's reported outcome and reconstructive uret           | 2011 | Eur. Urol.                     | Embase       | Editorial Comment |
| Petrou, S. P                                  | Dorsal graft urethroplasty for female urethral stricture: Editorial comment.                                         | 2006 | Int. Braz. J. Urol.            | Embase       | Editorial Comment |
| Petrou, S. P., Brown, J. A., Blaivas, J. G.   | Re: Suprameatal transvaginal urethrolisis [3] (multiple letters).                                                    | 1999 | J. Urol.                       | Embase       | Editorial Comment |
| Reply by Authors.                             | Reply by Authors.                                                                                                    | 2009 | J. Urol.                       | Embase       | Editorial Comment |
| Santucci, R. A.                               | Editorial Comment.                                                                                                   | 2009 | Urology                        | Embase       | Editorial Comment |
| Sharma, D.                                    | Reconstructive urology in the tropical and developing world                                                          | 2002 | BJU Int.                       | Embase       | Editorial Comment |
| Sievert, K.-D., Seibold, J., & Stenzl, A.     | A comparison of one-stage procedures for post-traumatic urethral stricture repair: Editorial comment.                | 2006 | Int. Braz. J. Urol.            | Embase       | Editorial Comment |
| Springer, A.                                  | Reply from authors re: Antonella Giannantoni. Hypospadias classification and repair: The riddle of the sphinx        | 2011 | Eur. Urol.                     | Embase       | Editorial Comment |
| Wang, R., & Hellstrom, W. J. G.               | Men's health is evolving.                                                                                            | 2008 | Asian J Androl.                | Embase       | Editorial Comment |
| Whitfield, H. N.                              | Editorial comments.                                                                                                  | 1999 | Asian J. Surg                  | Embase       | Editorial Comment |
| Donkov, I. I., Bashir, A., Elenkov, C. H., e  | Dorsal onlay augmentation urethroplasty with small intestinal submucosa: Modified Barbagli technique for str         | 2006 | Int. J. Urol.                  | Embase       | Less than 9 pts   |
| Talug C, Brown ET, Wilson AM, et al.          | Traumatic complete urethral disruption: the West Virginia experience.                                                | 2010 | WV Med. J.                     | PubMed       | Less than 9 pts   |
| Tiguert R, Harb JF, Hurley PM, et al.         | Management of shotgun injuries to the pelvis and lower genitourinary system.                                         | 2000 | Urology                        | PubMed       | Less than 9 pts   |
| Al-Rifaei MA, Zaghloul S, Al-Rifaei AM.       | Bulboprostatic anastomotic urethroplasty with preservation of potency: anatomical study, operative approach          | 2005 | Scand. J. Urol. Nephrol.       | PubMed       | PFUDD             |
| Andrich, D. E., & Mundy, A. R.                | Reconstruction of pelvic fracture-related urethral injuries.                                                         | 2009 | J. Urol.                       | Embase       | PFUDD             |
| Anger JT, Sherman ND, Dielubanza E, et        | Erectile function after posterior urethroplasty for pelvic fracture-urethral distraction defect injuries.            | 2009 | BJU Int.                       | PubMed       | PFUDD             |
| Aşci R, Sarıkaya S, Büyükalpelli R, et al.    | Voiding and sexual dysfunctions after pelvic fracture urethral injuries treated with either initial cystostomy and   | 1999 | Scand. J. Urol. Nephrol.       | PubMed       | PFUDD             |
| Austoni, E., Guarneri, A., Colombo, F., et    | The new transperineal-prerectal approach in posterior urethroplasty.                                                 | 2005 | Ital. Urol. Androl.            | Embase       | PFUDD             |
| Bailly, G., & Kodama, R.                      | Management of posterior urethral injuries after pelvic trauma.                                                       | 2003 | Curr. Orthop.                  | Embase       | PFUDD             |
| Brandes, S., & Borrelli, J., Jr.              | Pelvic fracture and associated urologic injuries.                                                                    | 2001 | World J. Surg.                 | Embase       | PFUDD             |
| Chalouhy E, Jabbour M, Armache K, et a        | Management of posttraumatic posterior urethral disruption.                                                           | 1997 | J. Med. Liban.                 | PubMed       | PFUDD             |
| Corriere                                      | 1-stage delayed bulboprostatic anastomotic repair of posterior urethral rupture                                      | 2001 | J. Urol.                       | Other Search | PFUDD             |
| Derouiche, A., Belhaj, K., Hentati, H., et a  | Management of penile fractures complicated by urethral rupture.                                                      | 2008 | Int. J. Impot. Res.            | Embase       | PFUDD             |
| Elliott DS, Barrett DM.                       | Long-term followup and evaluation of primary realignment of posterior urethral disruptions.                          | 1997 | J. Urol.                       | PubMed       | PFUDD             |
| Feng C, Xu YM, Yu JJ, et al.                  | Risk factors for erectile dysfunction in patients with urethral strictures secondary to blunt trauma.                | 2008 | J. Sex. Med.                   | PubMed       | PFUDD             |
| Fiala, R., Zatura, F., & Vrtal, R.            | Our experience in the treatment of posttraumatic urethral distraction defects.                                       | 2001 | Acta Chir. Orthop. Traumat     | Embase       | PFUDD             |
| Flint, L., & Cryer, H. G.                     | Pelvic fracture: The last 50 years.                                                                                  | 2010 | J. Trauma Inj. Infect. Crit. C | Embase       | PFUDD             |

|                                               |                                                                                                                       |      |                          |              |       |
|-----------------------------------------------|-----------------------------------------------------------------------------------------------------------------------|------|--------------------------|--------------|-------|
| Gupta NP                                      | Does a previous end-to-end urethroplasty alter the results of redo end-to-end urethroplasty in patients with tr       | 2008 | Int. J. Urol.            | Other Search | PFUDD |
| Gupta NP, Mishra S, Dogra PN, et al.          | Transpubic urethroplasty for complex posterior urethral strictures: a single center experience.                       | 2009 | Urol. Int.               | PubMed       | PFUDD |
| Harwood, P. J., Grotz, M., Eardley, I., et al | Erectile dysfunction after fracture of the pelvis.                                                                    | 2005 | J. Bone Jt. Surg. Ser. B | Embase       | PFUDD |
| Healy CE, Leonard DS, Cahill R, et al.        | Primary endourologic realignment of complete posterior urethral disruption.                                           | 2007 | Ir. Med. J.              | PubMed       | PFUDD |
| Hosseini J, Tavakkoli Tabassi K.              | Surgical repair of posterior urethral defects: review of literature and presentation of experiences.                  | 2008 | Urol J.                  | PubMed       | PFUDD |
| Hussain, M., Rizvi, S. A. H., Lal, M., et al  | Management of Pelvic Fracture Urethral Distraction Defects (PFUDD) in a developing country.                           | 2011 | Eur. Urol.               | Embase       | PFUDD |
| Ibishev, K. S.                                | Efficiency of Combined Therapy with Impaza and Type 5 Phosphodiesterase Inhibitors in Prophylactics of Po             | 2009 | Bull. Exp. Biol. Med.    | Embase       | PFUDD |
| Jepson BR, Boullier JA, Moore RG, Parr        | Traumatic posterior urethral injury and early primary endoscopic realignment: evaluation of long-term follow-u        | 1999 | Urology                  | PubMed       | PFUDD |
| Jordan, G. H., Virasoro, R., & Eltahawy, B    | Reconstruction and management of posterior urethral and straddle injuries of the urethra.                             | 2006 | Urol. Clin. North Am.    | Embase       | PFUDD |
| KaLuzny, A., Matuszewski, M., & Krajka,       | Posterior urethroplasty for urethral injury associated with pelvic fracture.                                          | 2011 | Eur. Urol.               | Embase       | PFUDD |
| Kamal, B. A.                                  | Primary urethral realignment in traumatic urethral rupture.                                                           | 2000 | Bahrain Med. Bull.       | Embase       | PFUDD |
| Kathpalia, R., Mandal, S., & Goel, A.         | Long-term results of early endoscopic realignment of complete posterior urethral disruption.                          | 2011 | Indian J. Urol.          | Embase       | PFUDD |
| Katz, R., Golijanin, D., Blachar, A., et al.  | Resolution of posterior urethral rupture caused by a gunshot injury, treated with only suprapubic drainage.           | 1997 | BJU Int.                 | Embase       | PFUDD |
| Khan MS, Thornhill JA, Grainger R, et al.     | Rupture of the male membranous urethra.                                                                               | 2000 | Ir. J. Med. Sci.         | PubMed       | PFUDD |
| Koraitim MM.                                  | On the art of anastomotic posterior urethroplasty: a 27-year experience.                                              | 2005 | J. Urol.                 | PubMed       | PFUDD |
| Koraitim MM.                                  | Transpubic urethroplasty revisited: total, superior, or inferior pubectomy?                                           | 2010 | Urology                  | PubMed       | PFUDD |
| Koraitim, M. M.                               | Pelvic fracture urethral injuries revisited: A systematic review.                                                     | 2011 | Alex. J. Med.            | Embase       | PFUDD |
| Lumen N, Hoebeke P, Troyer BD, et al.         | Perineal anastomotic urethroplasty for posttraumatic urethral stricture with or without previous urethral manip       | 2009 | J. Urol.                 | PubMed       | PFUDD |
| Lumen N, Spiers S, De Backer S, et al.        | Assessment of the short-term functional outcome after urethroplasty: a prospective analysis.                          | 2011 | Int. Braz. J. Urol.      | Other Search | PFUDD |
| Manikandan R, Dorairajan LN, Kumar S.         | Current concepts in the management of pelvic fracture urethral distraction defects.                                   | 2011 | Indian J. Urol.          | Other Search | PFUDD |
| Mathur                                        | A retrospective analysis of delayed complications of urethroplasty at a tertiary care center                          | 2011 | Updates Surg.            | Google       | PFUDD |
| Mathur, R. K., Aggarwal, H., Odiya, S., et    | U-shaped prostatobulbar anastomosis for urethral injury after pelvic trauma.                                          | 2008 | Anz J. Surg.             | Embase       | PFUDD |
| Mathur, R., Aggarwal, G., Satsangi, B., et    | Prognosis of urethral strictures following pelvic fracture urethral distraction defects-A single centre study.        | 2011 | Int. J. Surg.            | Embase       | PFUDD |
| Morey AF, McAninch JW.                        | Reconstruction of posterior urethral disruption injuries: outcome analysis in 82 patients.                            | 1997 | J. Urol.                 | PubMed       | PFUDD |
| Moudouni SM, Patard JJ, Manunta A, et al      | Early endoscopic realignment of post-traumatic posterior urethral disruption.                                         | 2001 | Urology                  | PubMed       | PFUDD |
| Mouraviev VB, Coburn M, Santucci RA.          | The treatment of posterior urethral disruption associated with pelvic fractures: comparative experience of ear        | 2005 | J. Urol.                 | PubMed       | PFUDD |
| Mundy, A. R.                                  | Pelvic fracture injuries of the posterior urethra.                                                                    | 1999 | World J. Urol.           | Embase       | PFUDD |
| Myers, J. B., & Mcaninch, J. W.               | Management of posterior urethral disruption injuries.                                                                 | 2009 | Nat. Clin. Pract. Urol,  | Embase       | PFUDD |
| Philipraj, S. J.                              | Delayed repair is the ideal management for posterior urethral injuries- for the motion.                               | 2010 | Indian J. Urol.          | Embase       | PFUDD |
| Porter, J. R., Takayama, T. K., & Defalco,    | Traumatic posterior urethral injury and early realignment using magnetic urethral catheters.                          | 1997 | J. Urol.                 | Embase       | PFUDD |
| Pratap A, Agrawal CS, Pandit RK, et al.       | Factors contributing to a successful outcome of combined abdominal transpubic perineal urethroplasty for co           | 2006 | J. Urol.                 | PubMed       | PFUDD |
| Pratap A, Agrawal CS, Tiwari A, et al.        | Complex posterior urethral disruptions: management by combined abdominal transpubic perineal urethroplas              | 2006 | J. Urol.                 | PubMed       | PFUDD |
| Pratap, A., Gupta, D. K., Agrawal, C. S., et  | Complex urethral disruptions: In pursuit of a successful reconstruction.                                              | 2007 | Int. J. Urol.            | Embase       | PFUDD |
| Rehman J, Samadi D, Ricciardi R Jr, et al     | Early endoscopic realignment as primary therapy for complete posterior urethral disruptions.                          | 1998 | J. Endourol.             | PubMed       | PFUDD |
| Renjie, C., & Qiang, F.                       | Clinical study on the related factors between urethral stricture suffered from the urethral trauma after pelvic fr    | 2011 | Chin. J. Androl.         | Embase       | PFUDD |
| Salehipour M, Khezri A, Askari R, et al.      | Primary realignment of posterior urethral rupture.                                                                    | 2005 | Urol J.                  | Other Search | PFUDD |
| Sheikh, M. A.                                 | Modified pull-through urethroplasty.                                                                                  | 1999 | Asian J. Surg            | Embase       | PFUDD |
| Shenfeld OZ, Gofrit ON, Gdor Y, et al.        | The role of sildenafil in the treatment of erectile dysfunction in patients with pelvic fracture urethral disruption. | 2004 | J. Urol.                 | PubMed       | PFUDD |
| Shenfeld OZ, Gofrit ON, Gdor Y, et al.        | Anastomotic urethroplasty for failed previously treated membranous urethral rupture.                                  | 2004 | Urology                  | PubMed       | PFUDD |
| Shenfeld OZ, Kiselgorf D, Gofrit ON, et al    | The incidence and causes of erectile dysfunction after pelvic fractures associated with posterior urethral disru      | 2003 | J. Urol.                 | PubMed       | PFUDD |
| Shittu OB, Okeke LI, Kamara TB, et al.        | Delayed primary realignment of posterior urethral rupture.                                                            | 2003 | West Afr. J. Med.        | PubMed       | PFUDD |
| Shrinivas, R. P., & Dubey, D.                 | Primary urethral realignment should be the preferred option for the initial management of posterior urethral in       | 2010 | Indian J. Urol.          | Embase       | PFUDD |
| Sofer, M., Kaver, I., Beri, A., et al.        | Long-term results of early endoscopic realignment of complete posterior urethral disruption.                          | 2009 | J. Urol.                 | Embase       | PFUDD |
| Sofer, M., Mabjeesh, N. J., Ben-Chaim, J      | Long-term results of early endoscopic realignment of complete posterior urethral disruption.                          | 2010 | J. Endourol.             | Embase       | PFUDD |
| Tunc HM, Tefekli AH, Kaplancan T, et al.      | Delayed repair of post-traumatic posterior urethral distraction injuries: long-term results.                          | 2000 | Urology                  | PubMed       | PFUDD |

|                                                |                                                                                                                                 |      |                              |        |                   |
|------------------------------------------------|---------------------------------------------------------------------------------------------------------------------------------|------|------------------------------|--------|-------------------|
| Wang P, Fan M, Zhang Y, et al.                 | Modified urethral pull-through operation for posterior urethral stricture and long-term outcome.                                | 2008 | J. Urol.                     | PubMed | PFUDD             |
| Yin L, Li Z, Kong C, Yu X, et al.              | Urethral pull-through operation for the management of pelvic fracture urethral distraction defects.                             | 2011 | Urology                      | PubMed | PFUDD             |
| Yuan JB, Yang LY, Wang YH, et al.              | Hyperbaric oxygen therapy for recovery of erectile function after posterior urethral reconstruction.                            | 2011 | Int. Urol. Nephrol.          | PubMed | PFUDD             |
| Zhou ZS, Song B, Jin XY, et al.                | Operative techniques of anastomotic posterior urethroplasty for traumatic posterior urethral strictures.                        | 2007 | Chin. J. Traumatol.          | PubMed | PFUDD             |
| Agrawal, M. S., & Aron, M.                     | Long-term results with one-stage anastomotic urethroplasty for posterior urethral strictures.                                   | 1999 | Asian J. Surg                | Embase | Posterior Urethra |
| Al-Qudah HS, Santucci RA.                      | Extended complications of urethroplasty.                                                                                        | 2005 | Int. Braz. J. Urol.          | PubMed | Posterior Urethra |
| Berger AP, Deibl M, Bartsch G, et al.          | A comparison of one-stage procedures for post-traumatic urethral stricture repair.                                              | 2005 | BJU Int.                     | PubMed | Posterior Urethra |
| Dakum NK, Ramyil VM, Amu CO.                   | Outcome of urethroplasty for urethral stricture at Jos University Teaching Hospital.                                            | 2008 | Niger J. Clin. Pract.        | PubMed | Posterior Urethra |
| Esteban-María J,1 Mendoza-Lucio L.2            | Urethroplasty as urethral stricture treatment at the Hospital Universitario                                                     | 2010 | Rev. Mex. Urol.              | Google | Posterior Urethra |
| Gupta NP, Mishra S, Dogra PN, et al.           | Outcome of end-to-end urethroplasty: single-center experience.                                                                  | 2009 | Urol. Int.                   | PubMed | Posterior Urethra |
| Johnson EK, Latini JM.                         | The impact of urethroplasty on voiding symptoms and sexual function.                                                            | 2011 | Urology                      | PubMed | Posterior Urethra |
| Kessler TM, Fisch M, Heitz M, et al.           | Patient satisfaction with the outcome of surgery for urethral stricture.                                                        | 2002 | J. Urol.                     | PubMed | Posterior Urethra |
| Lau, W.                                        | Posterior urethroplasty.                                                                                                        | 1999 | Asian J. Surg                | Embase | Posterior Urethra |
| Martínez-Piñeiro JA, Cárcamo P, García         | Excision and anastomotic repair for urethral stricture disease: experience with 150 cases.                                      | 1997 | Eur. Urol.                   | PubMed | Posterior Urethra |
| Meeks JJ, Brandes SB, Morey AF, et al.         | Urethroplasty for radiotherapy induced bulbomembranous strictures: a multi-institutional experience.                            | 2011 | J. Urol.                     | PubMed | Posterior Urethra |
| Mehrsai A, Djaladat H, Salem S, et al.         | Outcome of buccal mucosal graft urethroplasty for long and repeated stricture repair.                                           | 2007 | Urology                      | PubMed | Posterior Urethra |
| Palminteri E, Berdondini E, Shokeir AA, et al. | Two-sided bulbar urethroplasty using dorsal plus ventral oral graft: urinary and sexual outcomes of a new technique.            | 2011 | J. Urol.                     | PubMed | Posterior Urethra |
| Patankar, S., Rasal, D., Shah, R., et al.      | Vessel-sparing urethroplasty.                                                                                                   | 2011 | Urology                      | Embase | Posterior Urethra |
| Pfalzgraf D, Olianias R, Schreiter F, et al.   | Two-staged urethroplasty: buccal mucosa and mesh graft techniques.                                                              | 2010 | Aktuelle Urol.               | PubMed | Posterior Urethra |
| Xie H, Xu YM, Xu XL, et al.                    | Evaluation of erectile function after urethral reconstruction: a prospective study.                                             | 2009 | Asian J Androl.              | PubMed | Posterior Urethra |
| Al-Qudah HS                                    | Complications of urethroplasty                                                                                                  | 2008 | Curr. Clin. Urol.            | Google | Review article    |
| Atala A.                                       | What's new in urology.                                                                                                          | 2004 | J. Am. Coll. Surg.           | PubMed | Review article    |
| Barbagli, G., & Lazzeri, M.                    | Patient's reported outcome and reconstructive urethral surgery: A 'first toe in the water'.                                     | 2011 | Eur. Urol.                   | Embase | Review article    |
| Brandes, S.                                    | Initial management of anterior and posterior urethral injuries.                                                                 | 2006 | Urol. Clin. North Am.        | Embase | Review article    |
| Cannon, A., & Abrams, P.                       | Diseases of the prostate.                                                                                                       | 2004 | Rev. Clin. Gerontol.         | Embase | Review article    |
| Carlton J, Patel M, Morey AF.                  | Erectile function after urethral reconstruction.                                                                                | 2008 | Asian J Androl.              | PubMed | Review article    |
| Chapple CR.                                    | Medical therapy and quality of life.                                                                                            | 1998 | Eur. Urol.                   | PubMed | Review article    |
| Guralnick, M. L., & Webster, G. D.             | The augmented anastomotic urethroplasty.                                                                                        | 2003 | Atlas Urol. Clin. North Am.  | Embase | Review article    |
| Jezior JR, Schlossberg SM.                     | Excision and primary anastomosis for anterior urethral stricture.                                                               | 2002 | Urol. Clin. North Am.        | PubMed | Review article    |
| Lue TF.                                        | Male sexual dysfunction--how little do we know?                                                                                 | 2003 | J. Urol.                     | PubMed | Review article    |
| Mundy, A. R., & Andrich, D. E.                 | Urethral trauma. Part II: Types of injury and their management.                                                                 | 2011 | BJU Int.                     | Embase | Review article    |
| Palminteri E, Franco G, Berdondini E, et al.   | Anterior urethroplasty and effects on sexual life: which is the best technique?                                                 | 2010 | Minerva Urol. Nefrol.        | PubMed | Review article    |
| Rosenstein, D. I., & Alsikafi, N. F.           | Diagnosis and classification of urethral injuries.                                                                              | 2006 | Urol. Clin. North Am.        | Embase | Review article    |
| Singh, S. K., Agrawal, S. K., & Mavuduru       | Management of the stricture of fossa navicularis and pendulous urethral strictures.                                             | 2011 | Indian J. Urol.              | Embase | Review article    |
| Wan, J., & Rew, K. T.                          | Common Penile Problems.                                                                                                         | 2010 | Prim. Care Clin. Off. Pract. | Embase | Review article    |
| <b>Duplicated and Incomplete Data Sets</b>     |                                                                                                                                 |      |                              |        |                   |
| Andrich, D., Venkatesan, K., Zacharakis,       | Non-transecting bulbar anastomotic urethroplasty: 1 Year outcome.                                                               | 2011 | J. Urol.                     | Embase | Duplication       |
| Welk, B., & Kodama, R.                         | Outcomes of the augmented non-transected anastomotic urethroplasty for the treatment of bulbar urethral stricture.              | 2011 | Urology                      | Embase | Duplication       |
| Vander Eeckt, K., & Joniau, S.                 | Erectile function after end-to-end repair, buccal mucosa roof strip augmented anastomosis or dorsal-inlay bulbar urethroplasty. | 2010 | Urology                      | Embase | Duplication       |
| Bhirud, P. S., Chawla, A., & Thomas, J.        | Upper transverse scrotal approach for urethral stricture: A novel approach.                                                     | 2010 | Indian J. Urol.              | Embase | Duplication       |
| Venkatesan, K., Zacharakis, E., Andrich,       | Non-transecting bulbar anastomotic urethroplasty: 1 year outcome.                                                               | 2011 | BJU Int.                     | Embase | Duplication       |
| Eeckt, K. V., & Joniau, S.                     | Single-stage salvage urethroplasty after previous open surgery.                                                                 | 2010 | J. Urol.                     | Embase | Duplication       |
| Eeckt, K., & Joniau, S.                        | Urethroplasty in multiple stages using buccal mucosa grafts Vander.                                                             | 2010 | Urology                      | Embase | Duplication       |
| Fransis, K., Vander Eeckt, K., Van Poppe       | Results of buccal mucosa grafts for repairing long bulbar urethral strictures.                                                  | 2010 | BJU Int.                     | Embase | Duplication       |
| Austoni, E., & Pini, G.                        | Combined perineal-prerectal approach and pedunculated penile skin flap autoplasty for complex bulbar-membranous strictures.     | 2010 | Urology                      | Embase | No %ED            |



|                                             |                                                                                                                  |      |              |        |                          |
|---------------------------------------------|------------------------------------------------------------------------------------------------------------------|------|--------------|--------|--------------------------|
| Sa, Y., Xu, Y., Fu, Q., et al.              | A comparative study of buccal mucosa graft and penile pedicle flap for reconstruction of anterior urethral stric | 2009 | Urology      | Embase | No %ED                   |
| SEHGAL, A., & Jolly, H.                     | Single-stage dorsal onlay buccal mucosa graft urethroplasty for complex (pendulous and pan-urehtral) strictu     | 2011 | J. Urol.     | Embase | No %ED                   |
| Morel Journel, N., Courtois, F., Leriche, A | Assessment of penile reconstructive surgery through perineal sensitivity, medical complications, patients sati   | 2009 | J. Sex. Med. | Embase | No ED Data               |
| Nuss, G. R., Granieri, M. A., Zhao, L. C.,  | Presenting symptoms of anterior urethral stricture disease: A disease specific, patient reported questionnaire   | 2012 | J. Urol.     | Embase | No outcomes              |
| Riechardt, S. R., Fisch, M. F., & Dahlem,   | Complex urethral reconstruction: Complication rates of the two-staged buccal mucosa repair.                      | 2009 | Eur. Urol.   | Embase | Complete ED data lacking |
